# Supplementary material for: Comparison and Validation of Some ITS Primer Pairs Useful for Fungal Metabarcoding Studies
Source: PubMed Central journal article supplement (PMC4059633; doi:10.1371/journal.pone.0097629), 2014-06-16

## Supporting Information Figure S1

Results of non-metric multi-dimensional scaling (NMDS) comparing community dissimilarities (based on Bray-Curtis distances) between each replicate (n = 4) of a sample (n = 7). Replicates are indicated by the same icon colour within a graph. Replicates with more similar communities are plotted more closely together than more dissimilar replicates. A. ITS1F/ITS2. B. ITS3/ITS4. C. ITS86F/ITS4

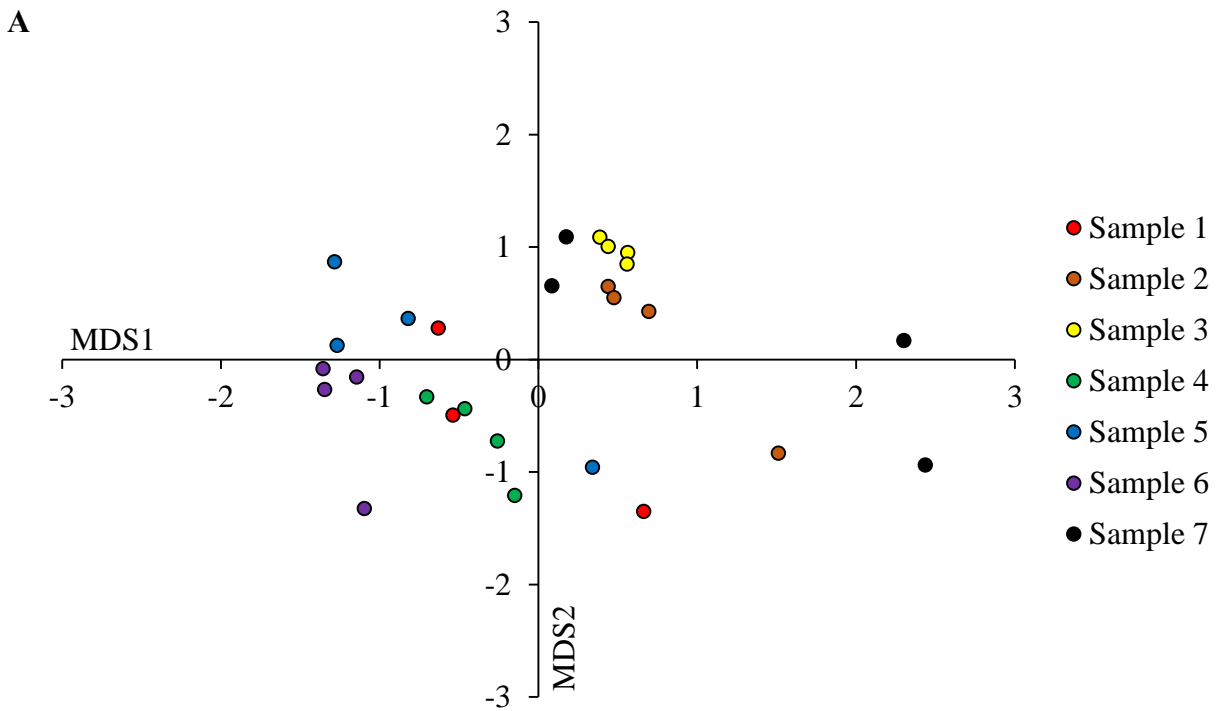

**B**

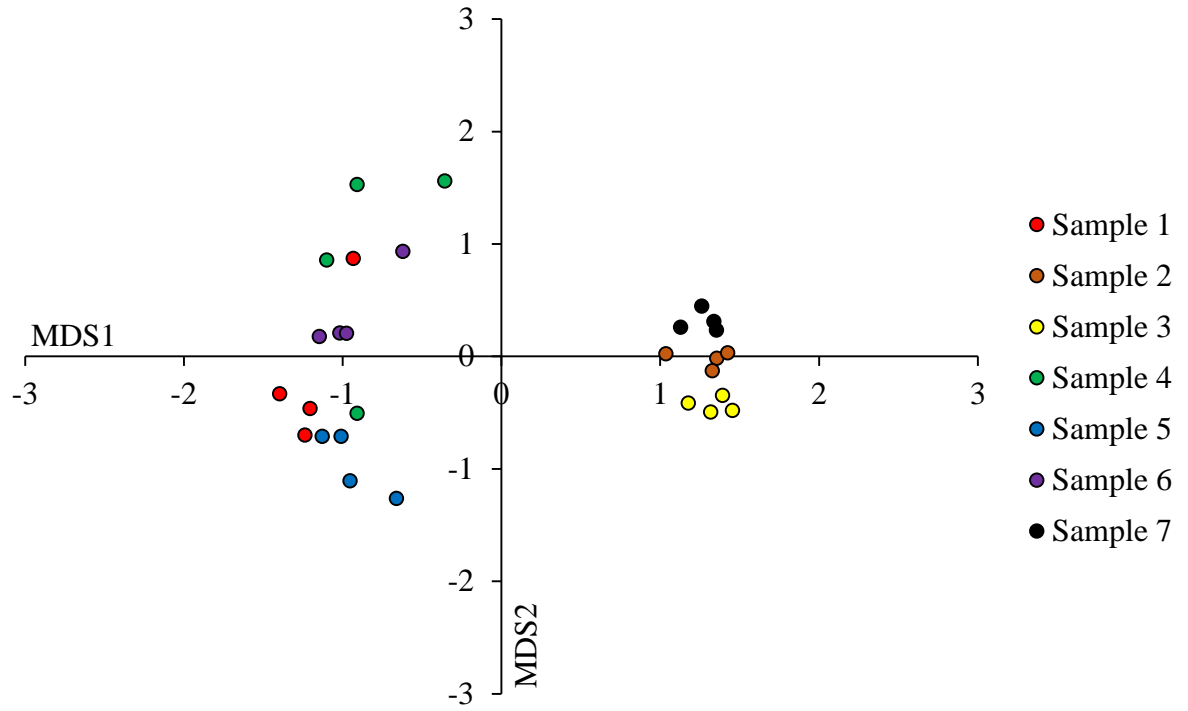

**C**

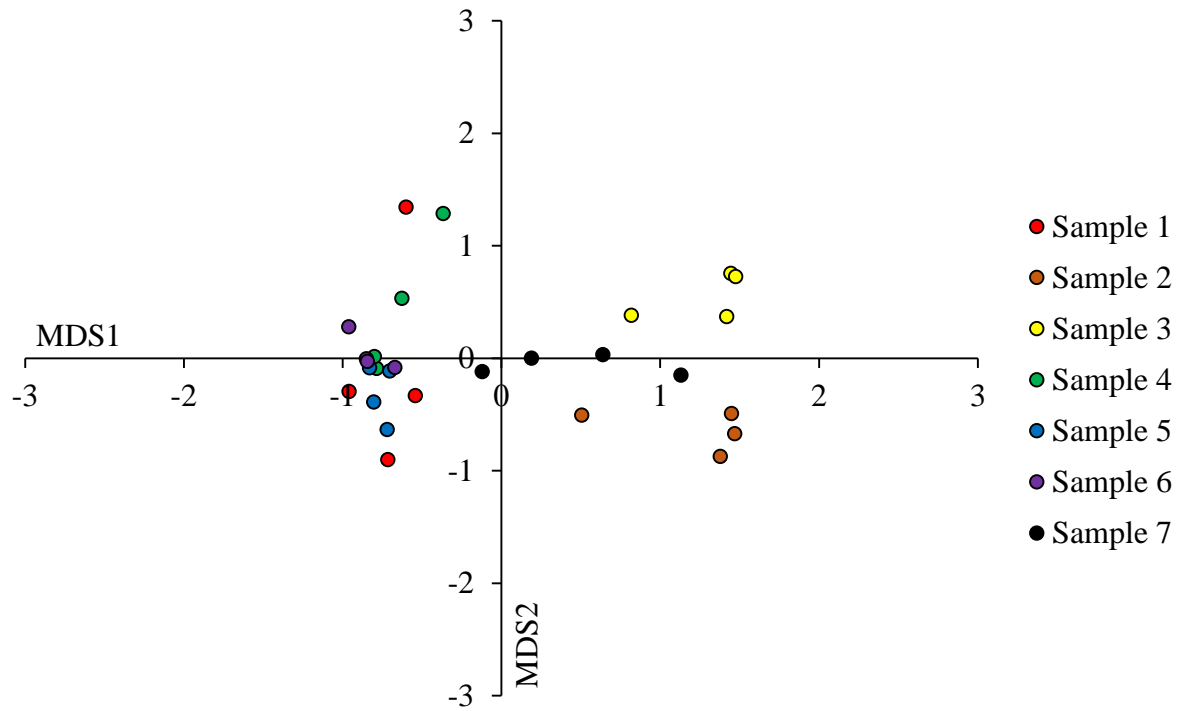

Supplement: pone.0097629.s001.pdf [file pone.0097629.s001.pdf]
