# Supplementary material for: Comparison and Validation of Some ITS Primer Pairs Useful for Fungal Metabarcoding Studies
Source: PubMed Central journal article supplement (PMC4059633; doi:10.1371/journal.pone.0097629), 2014-06-16

## Supporting Information Figure S2

Bar charts displaying the relative amount of reads that were assigned to a specific species-level operational taxonomic unit (OTU) by each primer pair used in this study (ITS1F/ITS2, ITS3/ITS4 and ITS86F/ITS4). Only the four most abundant species-level OTUs were displayed. The x-axes display all replicates and samples separately, where replicates appear as bars in the same colour and samples as different colours. The y-axes show the amount of reads found by a specific primer pair for one replicate of a sample relative (%) to the total amount of reads found for that OTU across all primer pairs, replicates and samples. A. *Sistotrema* sp. B. *Cladophialophora minutissima* C. *Wilcoxina mikolae* and D. *Rhizopogon luteolus*

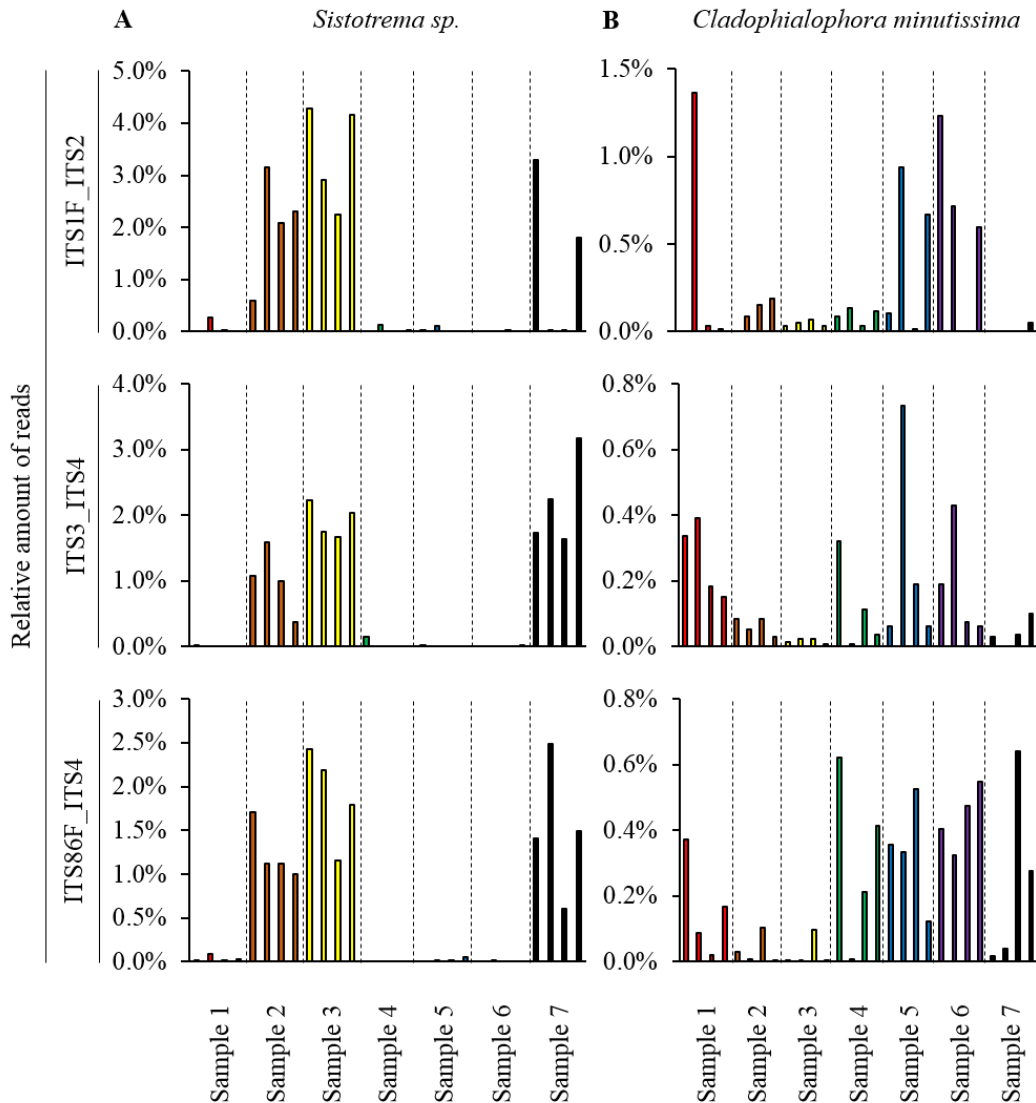

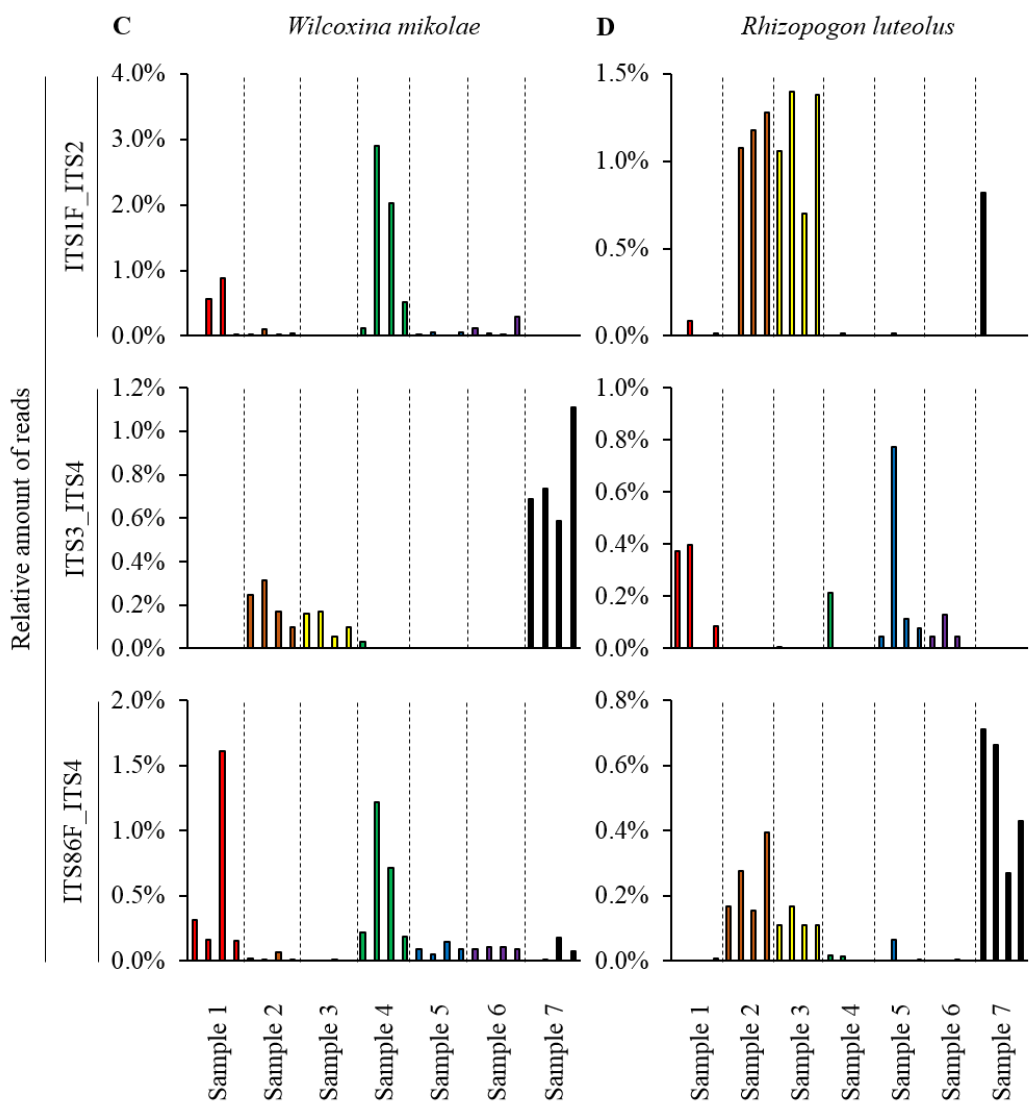

Supplement: pone.0097629.s002.pdf [file pone.0097629.s002.pdf]
