# Supplementary material for: Comparison and Validation of Some ITS Primer Pairs Useful for Fungal Metabarcoding Studies
Source: PubMed Central journal article supplement (PMC4059633; doi:10.1371/journal.pone.0097629), 2014-06-16
Supplement: pone.0097629.s003.pdf [file pone.0097629.s003.pdf]

## **Supporting Information Table S1**

To gain access to the study site, please contact:

### **Lt. Col. Van Reckem**

Military Domain Camp Beverloo

Kwartier 4 RCI

Koningin Louisa-Mariaaan 3

BE - 3970 Leopoldsburg

### **Lt. Col. Fuchs**

#### **Comm. E. Gorrens**

Military Domain Camp Beverloo

Bureel Planning

Koninklijk Park

BE - 3970 Leopoldsburg

Phone: +32 (0) 11 39 53 35

Phone: +32 (0) 11 39 53 36

E-mail: eddy.gorrens@mil.be
