# Supplementary material for: Comparison and Validation of Some ITS Primer Pairs Useful for Fungal Metabarcoding Studies
Source: PubMed Central journal article supplement (PMC4059633; doi:10.1371/journal.pone.0097629), 2014-06-16
Supplement: pone.0097629.s004.pdf [file pone.0097629.s004.pdf]

## Supporting Information Table S2

The following table displays the study design used in the 454 amplicon pyrosequencing experiment. Samples (n = 7), replicates of samples (n = 4) and used primers are indicated. Primers used for pyrosequencing are displayed as their respective components (454 adapter, multiplex identifier (MID) and fungal ITS primers).

| Sample   | Replicate   | Amplicon    | Forward primer* |       |                   | Reverse primer* |       |                   |
|----------|-------------|-------------|-----------------|-------|-------------------|-----------------|-------|-------------------|
|          |             |             | 454 adapter     | MID   | Fungal ITS primer | 454 adapter     | MID   | Fungal ITS primer |
| Sample 1 | Replicate 1 | Amplicon 1  | A               | MID12 | ITS1F             | B               | MID8  | ITS2              |
|          |             | Amplicon 2  | A               | MID12 | ITS3              | B               | MID8  | ITS4              |
|          |             | Amplicon 3  | A               | MID12 | ITS86F            | B               | MID8  | ITS4              |
|          | Replicate 2 | Amplicon 4  | A               | MID9  | ITS1F             | B               | MID12 | ITS2              |
|          |             | Amplicon 5  | A               | MID9  | ITS3              | B               | MID12 | ITS4              |
|          |             | Amplicon 6  | A               | MID9  | ITS86F            | B               | MID12 | ITS4              |
|          | Replicate 3 | Amplicon 7  | A               | MID8  | ITS1F             | B               | MID7  | ITS2              |
|          |             | Amplicon 8  | A               | MID8  | ITS3              | B               | MID7  | ITS4              |
|          |             | Amplicon 9  | A               | MID8  | ITS86F            | B               | MID7  | ITS4              |
|          | Replicate 4 | Amplicon 10 | A               | MID8  | ITS1F             | B               | MID8  | ITS2              |
|          |             | Amplicon 11 | A               | MID8  | ITS3              | B               | MID8  | ITS4              |
|          |             | Amplicon 12 | A               | MID8  | ITS86F            | B               | MID8  | ITS4              |
| Sample 2 | Replicate 1 | Amplicon 13 | A               | MID12 | ITS1F             | B               | MID9  | ITS2              |
|          |             | Amplicon 14 | A               | MID12 | ITS3              | B               | MID9  | ITS4              |
|          |             | Amplicon 15 | A               | MID12 | ITS86F            | B               | MID9  | ITS4              |
|          | Replicate 2 | Amplicon 16 | A               | MID9  | ITS1F             | B               | MID7  | ITS2              |
|          |             | Amplicon 17 | A               | MID9  | ITS3              | B               | MID7  | ITS4              |
|          |             | Amplicon 18 | A               | MID9  | ITS86F            | B               | MID7  | ITS4              |
|          | Replicate 3 | Amplicon 19 | A               | MID8  | ITS1F             | B               | MID9  | ITS2              |
|          |             | Amplicon 20 | A               | MID8  | ITS3              | B               | MID9  | ITS4              |
|          |             | Amplicon 21 | A               | MID8  | ITS86F            | B               | MID9  | ITS4              |
|          | Replicate 4 | Amplicon 22 | A               | MID9  | ITS1F             | B               | MID8  | ITS2              |
|          |             | Amplicon 23 | A               | MID9  | ITS3              | B               | MID8  | ITS4              |
|          |             | Amplicon 24 | A               | MID9  | ITS86F            | B               | MID8  | ITS4              |

|          |             |             |   |       |        |   |       |      |
|----------|-------------|-------------|---|-------|--------|---|-------|------|
| Sample 3 | Replicate 1 | Amplicon 25 | A | MID9  | ITS1F  | B | MID9  | ITS2 |
|          |             | Amplicon 26 | A | MID9  | ITS3   | B | MID9  | ITS4 |
|          |             | Amplicon 27 | A | MID9  | ITS86F | B | MID9  | ITS4 |
|          | Replicate 2 | Amplicon 28 | A | MID10 | ITS1F  | B | MID12 | ITS2 |
|          |             | Amplicon 29 | A | MID10 | ITS3   | B | MID12 | ITS4 |
|          |             | Amplicon 30 | A | MID10 | ITS86F | B | MID12 | ITS4 |
|          | Replicate 3 | Amplicon 31 | A | MID10 | ITS1F  | B | MID7  | ITS2 |
|          |             | Amplicon 32 | A | MID10 | ITS3   | B | MID7  | ITS4 |
|          |             | Amplicon 33 | A | MID10 | ITS86F | B | MID7  | ITS4 |
|          | Replicate 4 | Amplicon 34 | A | MID8  | ITS1F  | B | MID10 | ITS2 |
|          |             | Amplicon 35 | A | MID8  | ITS3   | B | MID10 | ITS4 |
|          |             | Amplicon 36 | A | MID8  | ITS86F | B | MID10 | ITS4 |
| Sample 4 | Replicate 1 | Amplicon 37 | A | MID10 | ITS1F  | B | MID8  | ITS2 |
|          |             | Amplicon 38 | A | MID10 | ITS3   | B | MID8  | ITS4 |
|          |             | Amplicon 39 | A | MID10 | ITS86F | B | MID8  | ITS4 |
|          | Replicate 2 | Amplicon 40 | A | MID9  | ITS1F  | B | MID10 | ITS2 |
|          |             | Amplicon 41 | A | MID9  | ITS3   | B | MID10 | ITS4 |
|          |             | Amplicon 42 | A | MID9  | ITS86F | B | MID10 | ITS4 |
|          | Replicate 3 | Amplicon 43 | A | MID10 | ITS1F  | B | MID9  | ITS2 |
|          |             | Amplicon 44 | A | MID10 | ITS3   | B | MID9  | ITS4 |
|          |             | Amplicon 45 | A | MID10 | ITS86F | B | MID9  | ITS4 |
|          | Replicate 4 | Amplicon 46 | A | MID10 | ITS1F  | B | MID10 | ITS2 |
|          |             | Amplicon 47 | A | MID10 | ITS3   | B | MID10 | ITS4 |
|          |             | Amplicon 48 | A | MID10 | ITS86F | B | MID10 | ITS4 |
| Sample 5 | Replicate 1 | Amplicon 49 | A | MID12 | ITS1F  | B | MID10 | ITS2 |
|          |             | Amplicon 50 | A | MID12 | ITS3   | B | MID10 | ITS4 |
|          |             | Amplicon 51 | A | MID12 | ITS86F | B | MID10 | ITS4 |
|          | Replicate 2 | Amplicon 52 | A | MID11 | ITS1F  | B | MID7  | ITS2 |
|          |             | Amplicon 53 | A | MID11 | ITS3   | B | MID7  | ITS4 |
|          |             | Amplicon 54 | A | MID11 | ITS86F | B | MID7  | ITS4 |
|          | Replicate 3 | Amplicon 55 | A | MID8  | ITS1F  | B | MID11 | ITS2 |
|          |             | Amplicon 56 | A | MID8  | ITS3   | B | MID11 | ITS4 |
|          |             | Amplicon 57 | A | MID8  | ITS86F | B | MID11 | ITS4 |
|          | Replicate 4 | Amplicon 58 | A | MID11 | ITS1F  | B | MID8  | ITS2 |
|          |             | Amplicon 59 | A | MID11 | ITS3   | B | MID8  | ITS4 |
|          |             | Amplicon 60 | A | MID11 | ITS86F | B | MID8  | ITS4 |

|          |             |             |   |       |        |   |       |      |
|----------|-------------|-------------|---|-------|--------|---|-------|------|
| Sample 6 | Replicate 1 | Amplicon 61 | A | MID9  | ITS1F  | B | MID11 | ITS2 |
|          |             | Amplicon 62 | A | MID9  | ITS3   | B | MID11 | ITS4 |
|          |             | Amplicon 63 | A | MID9  | ITS86F | B | MID11 | ITS4 |
|          | Replicate 2 | Amplicon 64 | A | MID11 | ITS1F  | B | MID9  | ITS2 |
|          |             | Amplicon 65 | A | MID11 | ITS3   | B | MID9  | ITS4 |
|          |             | Amplicon 66 | A | MID11 | ITS86F | B | MID9  | ITS4 |
|          | Replicate 3 | Amplicon 67 | A | MID10 | ITS1F  | B | MID11 | ITS2 |
|          |             | Amplicon 68 | A | MID10 | ITS3   | B | MID11 | ITS4 |
|          |             | Amplicon 69 | A | MID10 | ITS86F | B | MID11 | ITS4 |
|          | Replicate 4 | Amplicon 70 | A | MID11 | ITS1F  | B | MID10 | ITS2 |
|          |             | Amplicon 71 | A | MID11 | ITS3   | B | MID10 | ITS4 |
|          |             | Amplicon 72 | A | MID11 | ITS86F | B | MID10 | ITS4 |
| Sample 7 | Replicate 1 | Amplicon 73 | A | MID11 | ITS1F  | B | MID11 | ITS2 |
|          |             | Amplicon 74 | A | MID11 | ITS3   | B | MID11 | ITS4 |
|          |             | Amplicon 75 | A | MID11 | ITS86F | B | MID11 | ITS4 |
|          | Replicate 2 | Amplicon 76 | A | MID12 | ITS1F  | B | MID12 | ITS2 |
|          |             | Amplicon 77 | A | MID12 | ITS3   | B | MID12 | ITS4 |
|          |             | Amplicon 78 | A | MID12 | ITS86F | B | MID12 | ITS4 |
|          | Replicate 3 | Amplicon 79 | A | MID12 | ITS1F  | B | MID7  | ITS2 |
|          |             | Amplicon 80 | A | MID12 | ITS3   | B | MID7  | ITS4 |
|          |             | Amplicon 81 | A | MID12 | ITS86F | B | MID7  | ITS4 |
|          | Replicate 4 | Amplicon 82 | A | MID8  | ITS1F  | B | MID12 | ITS2 |
|          |             | Amplicon 83 | A | MID8  | ITS3   | B | MID12 | ITS4 |
|          |             | Amplicon 84 | A | MID8  | ITS86F | B | MID12 | ITS4 |

| Sequence name* | Primer sequence (5'-3')   | Reference |
|----------------|---------------------------|-----------|
| A              | CGTATCGCCTCCCTCGCGCCATCAG |           |
| B              | CTATGCGCCTTGCCAGCCCGCTCAG |           |
| ITS1F          | CTTGGTCATTTAGAGGAAGTAA    | [19]      |
| ITS2           | GCTGCGTTCTTCATCGATGC      | [18]      |
| ITS3           | GCATCGATGAAGAACGCAGC      | [18]      |
| ITS4           | TCCCTCCGCTTATTGATATGC     | [18]      |
| ITS86F         | GTGAATCATCGAATCTTTGAA     | [26]      |
| MID7           | CGTGTCTCTA                |           |
| MID8           | CTCGCGTGTC                |           |
| MID9           | TAGTATCAGC                |           |
| MID10          | TCTCTATGCG                |           |
| MID11          | TGATACGTCT                |           |
| MID12          | TACTGAGCTA                |           |

\* Abbreviations used

A: 454 pyrosequencing adapter A

B: 454 pyrosequencing adapter B

MID: Multiplex identifier

ITS: Internal transcribed spacer
