# Supplementary material for: Comparison and Validation of Some ITS Primer Pairs Useful for Fungal Metabarcoding Studies
Source: PubMed Central journal article supplement (PMC4059633; doi:10.1371/journal.pone.0097629), 2014-06-16
Supplement: pone.0097629.s005.pdf [file pone.0097629.s005.pdf]

### Supporting Information Table S3

The following table shows the selected BLAST hit References, E-values and corresponding BLAST scores for all OTUs identified at a 97% sequence similarity cut-off in the current study. OTUs were blasted against the UNITE and INSD databases using the massBLASter tool available from PlutoF v2.0 (<http://unite.ut.ee/workbench.php>). OTUs that did not have a BLAST hit in the UNITE or INSD databases are indicated as “not applicable (NA)”

| Reference                            | Score | E-value |
|--------------------------------------|-------|---------|
| <i>Abrothallus suecicus</i>          | 318   | 5.E-86  |
| <i>Absconditella lignicola</i>       | 163   | 3.E-39  |
| <i>Absconditella lignicola</i>       | 168   | 1.E-40  |
| <i>Absidia caerulea</i>              | 459   | 2.E-128 |
| <i>Absidia caerulea</i>              | 470   | 1.E-131 |
| <i>Acanthostigma perpusillum</i>     | 311   | 8.E-84  |
| <i>Acephala macrosclerotiorum</i>    | 343   | 1.E-93  |
| <i>Acephala macrosclerotiorum</i>    | 388   | 6.E-107 |
| <i>Acephala macrosclerotiorum</i>    | 436   | 1.E-121 |
| <i>Acremonium</i> sp BCC 14080       | 340   | 1.E-92  |
| <i>Acremonium strictum</i>           | 411   | 1.E-113 |
| <i>Acremonium strictum</i>           | 315   | 7.E-85  |
| <i>Agaricus pinsitus</i>             | 542   | 4.E-153 |
| <i>Agaricus pinsitus</i>             | 529   | 2.E-149 |
| <i>Alatospora acuminata</i>          | 180   | 3.E-44  |
| <i>Aliquandostipite khaoyaiensis</i> | 87.2  | 2.E-16  |
| <i>Alternaria alternata</i>          | 65    | 2.E-09  |
| <i>Alternaria alternata</i>          | 412   | 2.E-114 |
| <i>Alternaria consortialis</i>       | 481   | 5.E-135 |
| <i>Alternaria rosae</i>              | 484   | 5.E-136 |
| <i>Alternaria tenuissima</i>         | 486   | 2.E-136 |
| <i>Alternaria triticina</i>          | 115   | 6.E-25  |
| <i>Alternaria triticina</i>          | 462   | 2.E-129 |
| <i>Amanita muscaria</i>              | 586   | 2.E-166 |
| <i>Anhelia nectandrae</i>            | 355   | 7.E-97  |
| Antarctic yeast CBS 8941             | 473   | 1.E-132 |
| Antarctic yeast CBS 8941             | 425   | 4.E-118 |
| <i>Anthracotheceum prasinum</i>      | 87.9  | 2.E-16  |
| <i>Anthracotheceum prasinum</i>      | 87.9  | 2.E-16  |
| <i>Arachnopeziza aurata</i>          | 396   | 3.E-109 |
| <i>Arachnopeziza aurata</i>          | 348   | 6.E-95  |
| <i>Arnium gigantosporum</i>          | 288   | 5.E-77  |
| <i>Arnium macrotheca</i>             | 467   | 9.E-131 |
| <i>Arnium macrotheca</i>             | 433   | 2.E-120 |

|                                       |      |         |
|---------------------------------------|------|---------|
| <i>Arthrinium sacchari</i>            | 477  | 1.E-133 |
| <i>Arthrinium sacchari</i>            | 475  | 3.E-133 |
| <i>Arthrobotrys oligospora</i>        | 85.6 | 1.E-15  |
| <i>Articulospora proliferata</i>      | 431  | 8.E-120 |
| <i>Articulospora proliferata</i>      | 390  | 1.E-107 |
| <i>Ascobrunneispora aquatica</i>      | 229  | 4.E-59  |
| <i>Ascomycota</i> sp 6 RB 2011        | 383  | 1.E-105 |
| <i>Ascomycota</i> sp 6 RB 2011        | 340  | 1.E-92  |
| <i>Ascomycota</i> sp AM12             | 374  | 2.E-102 |
| <i>Ascomycota</i> sp AR 2010          | 420  | 2.E-116 |
| <i>Ascomycota</i> sp AR 2010          | 416  | 2.E-115 |
| <i>Ascomycota</i> sp AR 2010          | 370  | 1.E-101 |
| <i>Ascomycota</i> sp ARIZ OCAsh3 11   | 393  | 2.E-108 |
| <i>Ascomycota</i> sp ARIZ OCAsh3 11   | 335  | 5.E-91  |
| <i>Ascomycota</i> sp CH Co12          | 457  | 1.E-127 |
| <i>Ascomycota</i> sp GMU LL 02 B3     | 443  | 1.E-123 |
| <i>Ascomycota</i> sp GMU LL 02 B3     | 412  | 2.E-114 |
| <i>Ascomycota</i> sp I306             | 391  | 6.E-108 |
| <i>Ascomycota</i> sp r433             | 150  | 2.E-35  |
| <i>Aspergillus viridinutans</i>       | 497  | 8.E-140 |
| <i>Aspicilia cinerea</i>              | 252  | 7.E-66  |
| <i>Aspicilia dendroplaca</i>          | 265  | 6.E-70  |
| <i>Aspicilia verruculosa</i>          | 320  | 2.E-86  |
| <i>Asteridiella obesa</i>             | 74.5 | 2.E-12  |
| <i>Asterophora</i> sp aurim714        | 332  | 3.E-90  |
| <i>Athelia epiphylla</i>              | 420  | 2.E-116 |
| <i>Athelopsis lembospora</i>          | 484  | 6.E-136 |
| <i>Aulographina pinorum</i>           | 361  | 8.E-99  |
| <i>Aureobasidium pullulans</i>        | 405  | 3.E-112 |
| <i>Aureobasidium pullulans</i>        | 480  | 1.E-134 |
| <i>Aureobasidium pullulans</i>        | 457  | 1.E-127 |
| <i>Aureobasidium pullulans</i>        | 195  | 8.E-49  |
| <i>Aureobasidium pullulans</i>        | 187  | 1.E-46  |
| <i>Bacidina chlorotricula</i>         | 392  | 3.E-108 |
| <i>Bacidina flavoleprosa</i>          | 142  | 5.E-33  |
| <i>Bacidina flavoleprosa</i>          | 114  | 2.E-24  |
| <i>Barriopsis fusca</i>               | 237  | 1.E-61  |
| <i>Basidioidendron caesiocinereum</i> | 163  | 4.E-39  |
| <i>Basidioidendron caesiocinereum</i> | 100  | 2.E-20  |
| <i>Beauveria pseudobassiana</i>       | 468  | 5.E-131 |
| <i>Bellemerea alpina</i>              | 196  | 2.E-49  |
| <i>Belonopsis eriophori</i>           | 359  | 3.E-98  |
| <i>Betamyces americaemeridionalis</i> | 87.2 | 2.E-16  |
| <i>Betamyces americaemeridionalis</i> | 193  | 5.E-48  |
| <i>Betamyces americaemeridionalis</i> | 86.1 | 7.E-16  |
| <i>Betamyces americaemeridionalis</i> | 86.1 | 7.E-16  |
| <i>Bipolaris sorokiniana</i>          | 391  | 6.E-108 |

|                                         |      |         |
|-----------------------------------------|------|---------|
| <i>Bjerkandera fumosa</i>               | 510  | 9.E-144 |
| <i>Boletus edulis</i>                   | 448  | 4.E-125 |
| <i>Boletus edulis</i>                   | 732  | 0.E+00  |
| <i>Botryobambusa fusicoccum</i>         | 375  | 3.E-103 |
| <i>Botryosporium longibrachiatum</i>    | 97.1 | 3.E-19  |
| <i>Botryotinia fuckeliana</i>           | 462  | 2.E-129 |
| <i>Botryotinia fuckeliana</i>           | 440  | 1.E-122 |
| <i>Bovista dermoxantha</i>              | 547  | 7.E-155 |
| <i>Brunneodinemasporium brasiliense</i> | 337  | 1.E-91  |
| <i>Brunneodinemasporium brasiliense</i> | 272  | 4.E-72  |
| <i>Bryoglossum gracile</i>              | 348  | 4.E-95  |
| <i>Bullera globispora</i>               | 245  | 5.E-64  |
| <i>Bullera sakaeratica</i>              | 226  | 3.E-58  |
| <i>Cadophora finlandica</i>             | 454  | 6.E-127 |
| <i>Cadophora finlandica</i>             | 435  | 4.E-121 |
| <i>Cadophora finlandica</i>             | 296  | 2.E-79  |
| <i>Cadophora finlandica</i>             | 339  | 4.E-92  |
| <i>Calcarisporiella thermophila</i>     | 161  | 2.E-38  |
| <i>Calcarisporiella thermophila</i>     | 67.6 | 2.E-10  |
| <i>Calcarisporiella thermophila</i>     | 67.6 | 2.E-10  |
| <i>Calcarisporiella thermophila</i>     | 67.6 | 2.E-10  |
| <i>Calcarisporiella thermophila</i>     | 67.6 | 2.E-10  |
| <i>Calcarisporium arbuscula</i>         | 336  | 4.E-91  |
| <i>Calyptrozyma arxii</i>               | 324  | 6.E-88  |
| <i>Calyptrozyma arxii</i>               | 351  | 5.E-96  |
| <i>Camarographium koreanum</i>          | 320  | 2.E-86  |
| <i>Camarographium koreanum</i>          | 276  | 3.E-73  |
| <i>Candida homilentoma</i>              | 85.6 | 8.E-16  |
| <i>Candida novakii</i>                  | 240  | 2.E-62  |
| <i>Candida novakii</i>                  | 171  | 2.E-41  |
| <i>Candida ontarioensis</i>             | 103  | 6.E-21  |
| <i>Candida santamariae</i>              | 527  | 7.E-149 |
| <i>Candida santamariae</i>              | 510  | 9.E-144 |
| <i>Capronia pulcherrima</i>             | 337  | 1.E-91  |
| <i>Capronia sp 94003b</i>               | 331  | 6.E-90  |
| <i>Capronia sp 94003b</i>               | 407  | 1.E-112 |
| <i>Capronia sp 94003b</i>               | 420  | 1.E-116 |
| <i>Capronia sp 94003b</i>               | 381  | 6.E-105 |
| <i>Capronia sp 94003b</i>               | 387  | 1.E-106 |
| <i>Capronia sp 94003b</i>               | 320  | 1.E-86  |
| <i>Capronia sp 94003b</i>               | 309  | 2.E-83  |
| <i>Capronia sp 94003b</i>               | 320  | 1.E-86  |
| <i>Capronia sp 94006a</i>               | 288  | 8.E-77  |
| <i>Capronia sp 96003a</i>               | 323  | 2.E-87  |
| <i>Capronia sp 96003a</i>               | 340  | 1.E-92  |
| <i>Capronia sp 96003a</i>               | 366  | 2.E-100 |
| <i>Capronia sp 96003a</i>               | 302  | 4.E-81  |

|                                |      |         |
|--------------------------------|------|---------|
| Capronia sp 96003a             | 322  | 3.E-87  |
| Catenulifera brachyconia       | 426  | 2.E-118 |
| Catenulifera brevicollaris     | 329  | 2.E-89  |
| Catenulostroma hermanusense    | 364  | 7.E-100 |
| Catenulostroma hermanusense    | 444  | 8.E-124 |
| Catenulostroma microsporum     | 465  | 3.E-130 |
| Catenulostroma protearum       | 374  | 1.E-102 |
| Catenulostroma protearum       | 391  | 7.E-108 |
| Catenulostroma protearum       | 372  | 3.E-102 |
| Catenulostroma protearum       | 363  | 2.E-99  |
| Cenococcum geophilum           | 431  | 8.E-120 |
| Cenococcum geophilum           | 399  | 2.E-110 |
| Ceratocystis paradoxa          | 480  | 1.E-134 |
| Ceratocystis paradoxa          | 457  | 1.E-127 |
| Cercophora sulphurella         | 168  | 1.E-40  |
| Cercophora sulphurella         | 137  | 1.E-31  |
| Cercospora sophorae            | 551  | 5.E-156 |
| Chaenothecopsis pusiola        | 65   | 1.E-09  |
| Chaetomidium arxii             | 453  | 1.E-126 |
| Chaetomium aureum              | 486  | 2.E-136 |
| Chaetomium aureum              | 464  | 6.E-130 |
| Chaetomium aureum              | 207  | 1.E-52  |
| Chaetomium cupreum             | 431  | 6.E-120 |
| Chaetomium jodhpurensense      | 370  | 1.E-101 |
| Chaetomium nigricolor          | 473  | 1.E-132 |
| Chaetosphaeria bombycina       | 253  | 2.E-66  |
| Chaetosphaeria dilabens        | 331  | 9.E-90  |
| Chaetothyriales sp 16708       | 484  | 5.E-136 |
| Chaetothyriales sp 16708       | 457  | 1.E-127 |
| Chalara microspora             | 462  | 2.E-129 |
| Chalara microspora             | 401  | 5.E-111 |
| Chalara microspora             | 298  | 6.E-80  |
| Chalara pseudoaffinis          | 410  | 1.E-113 |
| Chlamydotubeufia khunkornensis | 180  | 2.E-44  |
| Chlorociboria argentinensis    | 215  | 4.E-55  |
| Chrysosporium merdarium        | 415  | 5.E-115 |
| Chrysosporium pseudomerdarium  | 401  | 5.E-111 |
| Cistella acuum                 | 294  | 8.E-79  |
| Cistella grevillei             | 391  | 7.E-108 |
| Cistella grevillei             | 355  | 4.E-97  |
| Cistella spicicola             | 344  | 8.E-94  |
| Cladonia borealis              | 446  | 2.E-124 |
| Cladonia coniocraea            | 63.4 | 6.E-09  |
| Cladonia diversa               | 407  | 1.E-112 |
| Cladonia fimbriata             | 142  | 7.E-33  |
| Cladonia fimbriata             | 136  | 6.E-31  |
| Cladonia fimbriata             | 136  | 6.E-31  |

|                    |     |         |
|--------------------|-----|---------|
| Cladonia fimbriata | 137 | 2.E-31  |
| Cladonia fimbriata | 148 | 9.E-35  |
| Cladonia fimbriata | 153 | 3.E-36  |
| Cladonia fimbriata | 458 | 8.E-128 |
| Cladonia fimbriata | 136 | 6.E-31  |
| Cladonia fimbriata | 114 | 3.E-24  |
| Cladonia fimbriata | 117 | 4.E-25  |
| Cladonia fimbriata | 117 | 3.E-25  |
| Cladonia fimbriata | 148 | 9.E-35  |
| Cladonia fimbriata | 148 | 9.E-35  |
| Cladonia fimbriata | 150 | 3.E-35  |
| Cladonia fimbriata | 136 | 6.E-31  |
| Cladonia fimbriata | 139 | 7.E-32  |
| Cladonia fimbriata | 134 | 2.E-30  |
| Cladonia fimbriata | 145 | 8.E-34  |
| Cladonia fimbriata | 110 | 3.E-23  |
| Cladonia fimbriata | 125 | 1.E-27  |
| Cladonia fimbriata | 145 | 8.E-34  |
| Cladonia fimbriata | 137 | 1.E-31  |
| Cladonia fimbriata | 120 | 4.E-26  |
| Cladonia fimbriata | 137 | 2.E-31  |
| Cladonia fimbriata | 141 | 2.E-32  |
| Cladonia fimbriata | 129 | 5.E-29  |
| Cladonia fimbriata | 134 | 2.E-30  |
| Cladonia fimbriata | 139 | 7.E-32  |
| Cladonia fimbriata | 286 | 2.E-76  |
| Cladonia fimbriata | 136 | 7.E-31  |
| Cladonia fimbriata | 131 | 1.E-29  |
| Cladonia fimbriata | 150 | 3.E-35  |
| Cladonia fimbriata | 156 | 4.E-37  |
| Cladonia fimbriata | 117 | 4.E-25  |
| Cladonia fimbriata | 141 | 2.E-32  |
| Cladonia fimbriata | 423 | 2.E-117 |
| Cladonia fimbriata | 117 | 3.E-25  |
| Cladonia fimbriata | 136 | 6.E-31  |
| Cladonia fimbriata | 142 | 8.E-33  |
| Cladonia fimbriata | 117 | 4.E-25  |
| Cladonia fimbriata | 129 | 5.E-29  |
| Cladonia fimbriata | 115 | 1.E-24  |
| Cladonia fimbriata | 114 | 3.E-24  |
| Cladonia fimbriata | 131 | 2.E-29  |
| Cladonia fimbriata | 132 | 1.E-29  |
| Cladonia fimbriata | 427 | 9.E-119 |
| Cladonia fimbriata | 416 | 2.E-115 |
| Cladonia foliacea  | 416 | 2.E-115 |
| Cladonia furcata   | 350 | 1.E-95  |
| Cladonia gracilis  | 443 | 1.E-123 |

|                                                |      |         |
|------------------------------------------------|------|---------|
| <i>Cladonia gracilis</i> subsp <i>elongata</i> | 448  | 5.E-125 |
| <i>Cladonia grayi</i>                          | 491  | 7.E-138 |
| <i>Cladonia grayi</i>                          | 347  | 2.E-94  |
| <i>Cladonia grayi</i>                          | 466  | 2.E-130 |
| <i>Cladonia merochlorophaea</i>                | 340  | 1.E-92  |
| <i>Cladophialophora chaetospira</i>            | 391  | 6.E-108 |
| <i>Cladophialophora chaetospira</i>            | 114  | 2.E-24  |
| <i>Cladophialophora chaetospira</i>            | 253  | 2.E-66  |
| <i>Cladophialophora chaetospira</i>            | 345  | 5.E-94  |
| <i>Cladophialophora humicolae</i>              | 549  | 2.E-155 |
| <i>Cladophialophora humicolae</i>              | 665  | 0.E+00  |
| <i>Cladophialophora minutissima</i>            | 383  | 1.E-105 |
| <i>Cladophialophora minutissima</i>            | 318  | 5.E-86  |
| <i>Cladophialophora minutissima</i>            | 331  | 8.E-90  |
| <i>Cladophialophora minutissima</i>            | 331  | 8.E-90  |
| <i>Cladophialophora minutissima</i>            | 348  | 4.E-95  |
| <i>Cladophialophora minutissima</i>            | 394  | 8.E-109 |
| <i>Cladophialophora minutissima</i>            | 418  | 6.E-116 |
| <i>Cladophialophora minutissima</i>            | 413  | 2.E-114 |
| <i>Cladophialophora minutissima</i>            | 394  | 7.E-109 |
| <i>Cladophialophora minutissima</i>            | 355  | 7.E-97  |
| <i>Cladophialophora minutissima</i>            | 440  | 1.E-122 |
| <i>Cladophialophora minutissima</i>            | 442  | 3.E-123 |
| <i>Cladophialophora minutissima</i>            | 357  | 1.E-97  |
| <i>Cladophialophora minutissima</i>            | 398  | 6.E-110 |
| <i>Cladophialophora minutissima</i>            | 374  | 1.E-102 |
| <i>Cladophialophora minutissima</i>            | 392  | 3.E-108 |
| <i>Cladophialophora minutissima</i>            | 344  | 8.E-94  |
| <i>Cladophialophora modesta</i>                | 207  | 1.E-52  |
| <i>Cladophialophora scillae</i>                | 285  | 6.E-76  |
| <i>Cladosporium oxysporum</i>                  | 367  | 8.E-101 |
| <i>Claroideoglopus claroideum</i>              | 56.5 | 5.E-07  |
| <i>Claroideoglopus claroideum</i>              | 56.5 | 5.E-07  |
| <i>Claroideoglopus claroideum</i>              | 56.5 | 5.E-07  |
| <i>Claroideoglopus claroideum</i>              | 56.5 | 5.E-07  |
| <i>Claroideoglopus claroideum</i>              | 56.5 | 6.E-07  |
| <i>Claroideoglopus claroideum</i>              | 56.5 | 5.E-07  |
| <i>Claroideoglopus claroideum</i>              | 56.5 | 5.E-07  |
| <i>Claviradulomyces dabeicola</i>              | 237  | 2.E-61  |
| <i>Claviradulomyces dabeicola</i>              | 182  | 8.E-45  |
| <i>Clitocybe vermicularis</i>                  | 223  | 3.E-57  |
| <i>Clitopilus hobsonii</i>                     | 434  | 1.E-120 |
| <i>Clonostachys rosea</i>                      | 497  | 8.E-140 |
| <i>Clonostachys rosea</i>                      | 477  | 8.E-134 |
| <i>Coccomyces mucronatus</i>                   | 131  | 8.E-30  |
| <i>Coemansia asiatica</i>                      | 58.4 | 1.E-07  |
| <i>Coemansia asiatica</i>                      | 58.4 | 1.E-07  |

|                                               |      |         |
|-----------------------------------------------|------|---------|
| <i>Coemansia asiatica</i>                     | 56.5 | 5.E-07  |
| <i>Coleophoma eucalyptorum</i>                | 362  | 3.E-99  |
| <i>Coleophoma eucalyptorum</i>                | 364  | 9.E-100 |
| <i>Collophora hispanica</i>                   | 386  | 2.E-106 |
| <i>Collophora hispanica</i>                   | 342  | 4.E-93  |
| <i>Collophora hispanica</i>                   | 296  | 2.E-79  |
| <i>Collophora hispanica</i>                   | 346  | 2.E-94  |
| <i>Collophora hispanica</i>                   | 241  | 1.E-62  |
| <i>Collophora paarla</i>                      | 388  | 6.E-107 |
| <i>Coniochaeta gigantospora</i>               | 442  | 4.E-123 |
| <i>Coniochaeta gigantospora</i>               | 401  | 5.E-111 |
| <i>Coniochaeta prunicola</i>                  | 169  | 5.E-41  |
| <i>Coniothyrium fuckelii</i>                  | 465  | 3.E-130 |
| <i>Coniothyrium fuckelii</i>                  | 429  | 3.E-119 |
| <i>Coniothyrium fuckelii</i>                  | 433  | 2.E-120 |
| <i>Conlarium duplumascospora</i>              | 390  | 1.E-107 |
| <i>Conocybe echinata</i>                      | 545  | 3.E-154 |
| <i>Coprinellus disseminatus</i>               | 559  | 2.E-158 |
| <i>Coprinellus disseminatus</i>               | 553  | 2.E-156 |
| <i>Coprinellus verrucispermus</i>             | 523  | 1.E-147 |
| <i>Coprinopsis atramentaria</i>               | 546  | 1.E-154 |
| <i>Coprinopsis cinerea</i>                    | 545  | 4.E-154 |
| <i>Cordana pauciseptata</i>                   | 291  | 1.E-77  |
| <i>Cordyceps memorabilis</i>                  | 380  | 1.E-104 |
| <i>Cortinarius odorifer</i>                   | 168  | 2.E-40  |
| <i>Cortinarius parvannulatus</i>              | 516  | 2.E-145 |
| <i>Corynascus kuwaitiensis</i>                | 516  | 2.E-145 |
| <i>Corynascus kuwaitiensis</i>                | 416  | 2.E-115 |
| <i>Cosmospora vilior</i>                      | 245  | 4.E-64  |
| <i>Cryptococcus</i>                           | 324  | 6.E-88  |
| <i>Cryptococcus aerius</i>                    | 559  | 2.E-158 |
| <i>Cryptococcus aerius</i>                    | 545  | 3.E-154 |
| <i>Cryptococcus aff amylolyticus AS 22398</i> | 484  | 6.E-136 |
| <i>Cryptococcus aff amylolyticus AS 22398</i> | 381  | 6.E-105 |
| <i>Cryptococcus aff amylolyticus AS 22398</i> | 141  | 1.E-32  |
| <i>Cryptococcus aff amylolyticus AS 22398</i> | 265  | 7.E-70  |
| <i>Cryptococcus aff amylolyticus AS 22398</i> | 318  | 6.E-86  |
| <i>Cryptococcus aff amylolyticus AS 22398</i> | 379  | 2.E-104 |
| <i>Cryptococcus aff amylolyticus AS 22398</i> | 462  | 2.E-129 |
| <i>Cryptococcus aff laurentii D 0721a1</i>    | 191  | 1.E-47  |
| <i>Cryptococcus cylindricus</i>               | 560  | 1.E-158 |
| <i>Cryptococcus dimennae</i>                  | 204  | 2.E-51  |
| <i>Cryptococcus dimennae</i>                  | 126  | 3.E-28  |
| <i>Cryptococcus dimennae</i>                  | 130  | 2.E-29  |
| <i>Cryptococcus flavus</i>                    | 198  | 7.E-50  |
| <i>Cryptococcus laurentii</i>                 | 215  | 7.E-55  |
| <i>Cryptococcus laurentii</i>                 | 147  | 3.E-34  |

|                                                        |     |         |
|--------------------------------------------------------|-----|---------|
| <i>Cryptococcus laurentii</i>                          | 492 | 3.E-138 |
| <i>Cryptococcus paraflavus</i>                         | 258 | 9.E-68  |
| <i>Cryptococcus podzolicus</i>                         | 489 | 2.E-137 |
| <i>Cryptococcus podzolicus</i>                         | 269 | 4.E-71  |
| <i>Cryptococcus podzolicus</i>                         | 468 | 5.E-131 |
| <i>Cryptococcus podzolicus</i>                         | 200 | 2.E-50  |
| <i>Cryptococcus podzolicus</i>                         | 111 | 9.E-24  |
| <i>Cryptococcus podzolicus</i>                         | 130 | 2.E-29  |
| <i>Cryptococcus podzolicus</i>                         | 202 | 6.E-51  |
| <i>Cryptococcus podzolicus</i>                         | 231 | 7.E-60  |
| <i>Cryptococcus podzolicus</i>                         | 119 | 5.E-26  |
| <i>Cryptococcus randhawii</i>                          | 578 | 4.E-164 |
| <i>Cryptococcus randhawii</i>                          | 568 | 6.E-161 |
| <i>Cryptococcus</i> sp BI20                            | 196 | 2.E-49  |
| <i>Cryptococcus</i> sp VPCI 1367 B1                    | 111 | 8.E-24  |
| <i>Cryptococcus terricola</i>                          | 380 | 1.E-104 |
| <i>Cryptococcus terricola</i>                          | 458 | 6.E-128 |
| <i>Cryptococcus terricola</i>                          | 604 | 5.E-172 |
| <i>Cryptococcus terricola</i>                          | 235 | 7.E-61  |
| <i>Cryptococcus victoriae</i>                          | 329 | 2.E-89  |
| <i>Cryptococcus victoriae</i>                          | 404 | 9.E-112 |
| <i>Cryptococcus victoriae</i>                          | 416 | 2.E-115 |
| <i>Cryptococcus wieringae</i>                          | 599 | 2.E-170 |
| <i>Cryptosporiopsis actinidiae</i>                     | 104 | 2.E-21  |
| <i>Cryptosporiopsis actinidiae</i>                     | 380 | 2.E-104 |
| <i>Cryptosporiopsis actinidiae</i>                     | 169 | 5.E-41  |
| <i>Cudoniella acicularis</i>                           | 271 | 1.E-71  |
| <i>Cudoniella acicularis</i>                           | 399 | 3.E-110 |
| <i>Cudoniella clavus</i>                               | 378 | 4.E-104 |
| <i>Curreya pityophila</i>                              | 369 | 3.E-101 |
| <i>Cyphellophora hylomeconis</i>                       | 385 | 6.E-106 |
| <i>Dactylaria lanosa</i>                               | 340 | 1.E-92  |
| <i>Dactylella oviparasitica</i>                        | 163 | 4.E-39  |
| <i>Dactylellina drechsleri</i>                         | 504 | 1.E-141 |
| <i>Dactylellina drechsleri</i>                         | 462 | 2.E-129 |
| <i>Dactylellina ellipsospora</i>                       | 478 | 4.E-134 |
| <i>Dactylellina phymatopaga</i>                        | 174 | 1.E-42  |
| <i>Daldinia fissa</i>                                  | 396 | 2.E-109 |
| <i>Davidiella tassiana</i>                             | 436 | 1.E-121 |
| <i>Debaryomyces hansenii</i>                           | 529 | 2.E-149 |
| <i>Debaryomyces polymorphus</i> var <i>polymorphus</i> | 543 | 1.E-153 |
| <i>Debaryomyces polymorphus</i> var <i>polymorphus</i> | 525 | 3.E-148 |
| <i>Degelia gayana</i>                                  | 313 | 2.E-84  |
| <i>Degelia gayana</i>                                  | 213 | 2.E-54  |
| <i>Devriesia pseudoamericana</i>                       | 350 | 2.E-95  |
| <i>Devriesia pseudoamericana</i>                       | 369 | 3.E-101 |
| <i>Devriesia pseudoamericana</i>                       | 298 | 6.E-80  |



|                                                      |     |         |
|------------------------------------------------------|-----|---------|
| <i>Devriesia pseudoamericana</i>                     | 296 | 2.E-79  |
| <i>Devriesia pseudoamericana</i>                     | 281 | 6.E-75  |
| <i>Devriesia pseudoamericana</i>                     | 335 | 5.E-91  |
| <i>Dinemasporium morbidum</i>                        | 356 | 2.E-97  |
| <i>Dinemasporium morbidum</i>                        | 480 | 1.E-134 |
| <i>Dinemasporium pseudostrigosum</i>                 | 439 | 4.E-122 |
| <i>Dinemasporium pseudostrigosum</i>                 | 414 | 6.E-115 |
| <i>Dinemasporium pseudostrigosum</i>                 | 363 | 2.E-99  |
| <i>Dinemasporium strigosum</i>                       | 266 | 3.E-70  |
| <i>Dinemasporium strigosum</i>                       | 400 | 8.E-111 |
| <i>Dinemasporium strigosum</i>                       | 374 | 8.E-103 |
| <i>Dioszegia athyri</i>                              | 425 | 3.E-118 |
| <i>Dioszegia rishiriensis</i>                        | 415 | 4.E-115 |
| <i>Dokmaia monthadangii</i>                          | 459 | 2.E-128 |
| <i>Dothideomycetes</i> sp DC2167                     | 448 | 6.E-125 |
| <i>Dothideomycetes</i> sp genotype 188               | 313 | 2.E-84  |
| <i>Dothideomycetes</i> sp genotype 188               | 259 | 3.E-68  |
| <i>Drechslera erythrospila</i>                       | 415 | 5.E-115 |
| <i>Drechslera erythrospila</i>                       | 475 | 4.E-133 |
| <i>Drechslera erythrospila</i>                       | 460 | 8.E-129 |
| <i>Drechslera nobleae</i>                            | 304 | 1.E-81  |
| <i>Drechslera nobleae</i>                            | 329 | 3.E-89  |
| <i>Drechslera poae</i>                               | 381 | 6.E-105 |
| <i>Elsinoe ampelina</i>                              | 320 | 2.E-86  |
| <i>Emericella nidulans</i>                           | 123 | 4.E-27  |
| <i>Emericella nidulans</i>                           | 109 | 8.E-23  |
| <i>Emericella nidulans</i>                           | 155 | 1.E-36  |
| <i>Emericella nidulans</i>                           | 381 | 6.E-105 |
| <i>Emericella nidulans</i>                           | 147 | 3.E-34  |
| <i>Emericella purpurea</i>                           | 125 | 7.E-28  |
| <i>Emmonsia parva</i>                                | 519 | 2.E-146 |
| <i>Entoloma conferendum</i>                          | 439 | 4.E-122 |
| <i>Epacris microphylla</i> root associated fungus 12 | 453 | 2.E-126 |
| <i>Epacris microphylla</i> root associated fungus 12 | 435 | 5.E-121 |
| <i>Epacris microphylla</i> root associated fungus 17 | 472 | 3.E-132 |
| <i>Epacris microphylla</i> root associated fungus 21 | 431 | 8.E-120 |
| <i>Epacris microphylla</i> root associated fungus 21 | 313 | 1.E-84  |
| <i>Epacris microphylla</i> root associated fungus 21 | 315 | 5.E-85  |
| <i>Epacris microphylla</i> root associated fungus 26 | 321 | 5.E-87  |
| <i>Epacris microphylla</i> root associated fungus 26 | 425 | 3.E-118 |
| <i>Epacris microphylla</i> root associated fungus 26 | 337 | 1.E-91  |
| <i>Epacris microphylla</i> root associated fungus 26 | 331 | 6.E-90  |
| <i>Epacris microphylla</i> root associated fungus 26 | 327 | 7.E-89  |
| <i>Epacris microphylla</i> root associated fungus 33 | 439 | 3.E-122 |
| <i>Epacris microphylla</i> root associated fungus 33 | 402 | 3.E-111 |
| <i>Epacris microphylla</i> root associated fungus 33 | 488 | 4.E-137 |
| <i>Epacris microphylla</i> root associated fungus 33 | 425 | 3.E-118 |

|                                                      |      |         |
|------------------------------------------------------|------|---------|
| <i>Epacris microphylla</i> root associated fungus 33 | 346  | 2.E-94  |
| <i>Epacris pulchella</i> root associated fungus EP20 | 427  | 9.E-119 |
| <i>Epacris pulchella</i> root associated fungus EP20 | 490  | 1.E-137 |
| <i>Epacris pulchella</i> root associated fungus EP26 | 167  | 2.E-40  |
| <i>Epacris pulchella</i> root associated fungus EP54 | 448  | 5.E-125 |
| <i>Epacris pulchella</i> root associated fungus EP55 | 401  | 5.E-111 |
| <i>Epicoccum nigrum</i>                              | 347  | 1.E-94  |
| <i>Eudarlucia caricis</i>                            | 212  | 5.E-54  |
| <i>Exobasidium kishianum</i>                         | 455  | 4.E-127 |
| <i>Exobasidium rostrupii</i>                         | 443  | 1.E-123 |
| <i>Exophiala bergeri</i>                             | 418  | 5.E-116 |
| <i>Exophiala equina</i>                              | 215  | 6.E-55  |
| <i>Exophiala eucalyptorum</i>                        | 491  | 7.E-138 |
| <i>Exophiala placitae</i>                            | 389  | 2.E-107 |
| <i>Exophiala sideris</i>                             | 462  | 3.E-129 |
| <i>Exophiala sideris</i>                             | 442  | 3.E-123 |
| <i>Filobasidium uniguttulatum</i>                    | 331  | 6.E-90  |
| <i>Filobasidium uniguttulatum</i>                    | 622  | 2.E-177 |
| <i>Friedmanniomyces endolithicus</i>                 | 367  | 1.E-100 |
| <i>Friedmanniomyces endolithicus</i>                 | 311  | 8.E-84  |
| fungal endophyte                                     | 340  | 1.E-92  |
| fungal sp 2747 YZ 2011                               | 416  | 2.E-115 |
| fungal sp ARIZ AZ0780                                | 433  | 2.E-120 |
| fungal sp NLEndoHerit 014 2008N5 26 2N               | 327  | 8.E-89  |
| <i>Funneliformis geosporum</i>                       | 109  | 6.E-23  |
| <i>Funneliformis geosporum</i>                       | 112  | 7.E-24  |
| <i>Funneliformis geosporum</i>                       | 109  | 7.E-23  |
| <i>Funneliformis geosporum</i>                       | 112  | 8.E-24  |
| <i>Fusarium biseptatum</i>                           | 355  | 7.E-97  |
| <i>Fusarium culmorum</i>                             | 355  | 5.E-97  |
| <i>Fusarium culmorum</i>                             | 336  | 3.E-91  |
| <i>Fusarium equiseti</i>                             | 322  | 5.E-87  |
| <i>Fusarium merismoides</i>                          | 457  | 1.E-127 |
| <i>Fusarium oxysporum</i>                            | 355  | 5.E-97  |
| <i>Fusarium oxysporum</i>                            | 391  | 6.E-108 |
| <i>Fusarium oxysporum</i>                            | 388  | 6.E-107 |
| <i>Fusarium oxysporum</i>                            | 448  | 6.E-125 |
| <i>Fusarium torulosum</i>                            | 497  | 8.E-140 |
| <i>Fusarium torulosum</i>                            | 466  | 2.E-130 |
| <i>Fusicladium cordae</i>                            | 502  | 3.E-141 |
| <i>Fusicladium cordae</i>                            | 277  | 2.E-73  |
| <i>Fusicladium cordae</i>                            | 484  | 5.E-136 |
| <i>Fusicladium cordae</i>                            | 213  | 2.E-54  |
| <i>Fusicladium phillyreae</i>                        | 213  | 2.E-54  |
| <i>Gaertneriomyces semiglobifer</i>                  | 80.5 | 4.E-14  |
| <i>Gammamyces ourimbahensis</i>                      | 85.6 | 6.E-16  |
| <i>Ganoderma adspersum</i>                           | 538  | 4.E-152 |

|                                |      |         |
|--------------------------------|------|---------|
| Ganoderma applanatum           | 440  | 1.E-122 |
| Ganoderma applanatum           | 542  | 4.E-153 |
| Ganoderma applanatum           | 529  | 2.E-149 |
| Geoglossum atropurpureum       | 174  | 1.E-42  |
| Geomyces pannorum              | 462  | 2.E-129 |
| Geomyces pannorum              | 393  | 2.E-108 |
| Geomyces vinaceus              | 442  | 3.E-123 |
| Geopora clausa                 | 82.4 | 6.E-15  |
| Geosmithia langdonii           | 183  | 2.E-45  |
| Geosmithia putterillii         | 137  | 2.E-31  |
| Glomerella graminicola         | 453  | 1.E-126 |
| Glomus custos                  | 126  | 4.E-28  |
| Glomus intraradices            | 106  | 6.E-22  |
| Glomus sp 3 SUN 2011           | 95.1 | 9.E-19  |
| Guignardia citricarpa          | 95.3 | 8.E-19  |
| Helicodendron multiseptatum    | 440  | 1.E-122 |
| Helotiaceae sp IV GK 2010      | 320  | 1.E-86  |
| Helotiales sp 1 CG 2012        | 312  | 4.E-84  |
| Helotiales sp 1 MV 2011        | 432  | 3.E-120 |
| Helotiales sp 1 MV 2011        | 387  | 1.E-106 |
| Helotiales sp 16 MV 2011       | 434  | 9.E-121 |
| Helotiales sp 16 MV 2011       | 431  | 8.E-120 |
| Helotiales sp 16 MV 2011       | 383  | 2.E-105 |
| Helotiales sp 16 MV 2011       | 348  | 6.E-95  |
| Helotiales sp 2 BB 2010        | 378  | 4.E-104 |
| Helotiales sp 27 MV 2011       | 427  | 8.E-119 |
| Helotiales sp 27 MV 2011       | 444  | 8.E-124 |
| Helotiales sp 5 CG 2012        | 318  | 4.E-86  |
| Helotiales sp I12F 02299       | 305  | 4.E-82  |
| Helotiales sp MU 2009 3        | 345  | 4.E-94  |
| Helotiales sp ODKB3            | 440  | 1.E-122 |
| Helotiales sp PIMO 265         | 247  | 1.E-64  |
| Helotiales sp REF045           | 405  | 3.E-112 |
| Helotiales sp REF055           | 315  | 4.E-85  |
| Helotiales sp SC3 4            | 467  | 9.E-131 |
| Helotiales sp SC9 3            | 388  | 5.E-107 |
| Helotiales sp SL11101          | 233  | 2.E-60  |
| Helotiales sp WMM 2012b        | 443  | 1.E-123 |
| Helotiales sp WMM 2012b        | 407  | 1.E-112 |
| Helotiales sp WMM 2012g        | 336  | 3.E-91  |
| Helotiales sp WMM 2012g        | 320  | 2.E-86  |
| Helvella maculata              | 291  | 8.E-78  |
| Helvella maculata              | 264  | 1.E-69  |
| Herpotrichiellaceae sp RB 2011 | 337  | 1.E-91  |
| Heterobasidion annosum         | 415  | 4.E-115 |
| Hirsutella minnesotensis       | 497  | 8.E-140 |
| Homortomyces combreti          | 215  | 6.E-55  |

|                                         |     |         |
|-----------------------------------------|-----|---------|
| <i>Humicolopsis cephalosporioides</i>   | 404 | 1.E-111 |
| <i>Humicolopsis cephalosporioides</i>   | 361 | 8.E-99  |
| <i>Humicolopsis cephalosporioides</i>   | 272 | 4.E-72  |
| <i>Humicolopsis cephalosporioides</i>   | 316 | 2.E-85  |
| <i>Hyaloscypha hepaticola</i>           | 385 | 4.E-106 |
| <i>Hyaloscypha</i> sp 2 13c             | 366 | 3.E-100 |
| <i>Hydnotrya tulasnei</i>               | 551 | 5.E-156 |
| <i>Hydnotrya tulasnei</i>               | 538 | 4.E-152 |
| <i>Hyphodontia breviseta</i>            | 385 | 6.E-106 |
| <i>Hypholoma fasciculare</i>            | 499 | 3.E-140 |
| <i>Hypholoma fasciculare</i>            | 567 | 9.E-161 |
| <i>Hypocrea lixii</i>                   | 510 | 1.E-143 |
| <i>Hypocrea lixii</i>                   | 492 | 3.E-138 |
| <i>Hypocrea voglmayrii</i>              | 259 | 3.E-68  |
| <i>Hypogymnia inactiva</i>              | 148 | 6.E-35  |
| <i>Hypomyces cervinigenus</i>           | 326 | 3.E-88  |
| <i>Infundichalara microchona</i>        | 405 | 4.E-112 |
| <i>Infundichalara microchona</i>        | 350 | 1.E-95  |
| <i>Infundichalara microchona</i>        | 369 | 3.E-101 |
| <i>Infundichalara microchona</i>        | 350 | 2.E-95  |
| <i>Infundichalara microchona</i>        | 366 | 2.E-100 |
| <i>Inocybe lacera</i> var <i>lacera</i> | 480 | 1.E-134 |
| <i>Inocybe lacera</i> var <i>lacera</i> | 559 | 2.E-158 |
| <i>Inocybe lacera</i> var <i>lacera</i> | 545 | 3.E-154 |
| <i>Inocybe ochroalba</i>                | 320 | 2.E-86  |
| <i>Inocybe ochroalba</i>                | 233 | 2.E-60  |
| <i>Johansonia chapadiensis</i>          | 150 | 3.E-35  |
| <i>Knufia chersonesos</i>               | 247 | 2.E-64  |
| <i>Knufia chersonesos</i>               | 449 | 2.E-125 |
| <i>Knufia chersonesos</i>               | 180 | 3.E-44  |
| <i>Kockovaella schimae</i>              | 383 | 2.E-105 |
| <i>Kurtzmanomyces nectairei</i>         | 215 | 8.E-55  |
| <i>Lachnum brevopilosum</i>             | 301 | 7.E-81  |
| <i>Lachnum</i> sp 1 MV 2011             | 440 | 1.E-122 |
| <i>Lachnum</i> sp 1 MV 2011             | 453 | 2.E-126 |
| <i>Lachnum</i> sp 1 MV 2011             | 420 | 1.E-116 |
| <i>Lachnum</i> sp 1 MV 2011             | 409 | 3.E-113 |
| <i>Lachnum</i> sp 252                   | 318 | 5.E-86  |
| <i>Lachnum virgineum</i>                | 150 | 2.E-35  |
| <i>Lasiochaeria ovina</i>               | 248 | 6.E-65  |
| <i>Lecanicillium psalliotae</i>         | 374 | 9.E-103 |
| <i>Lecanicillium psalliotae</i>         | 492 | 2.E-138 |
| <i>Lecanicillium psalliotae</i>         | 472 | 4.E-132 |
| <i>Lecanicillium psalliotae</i>         | 329 | 2.E-89  |
| <i>Lecythophora</i> sp BESC803p         | 446 | 2.E-124 |
| <i>Lecythophora</i> sp YP363            | 271 | 1.E-71  |
| <i>Lenzites betulinus</i>               | 556 | 2.E-157 |

|                                     |      |         |
|-------------------------------------|------|---------|
| Leotiomyces sp ASR H18 12A          | 301  | 9.E-81  |
| Leotiomyces sp ASR H18 12A          | 259  | 2.E-68  |
| Leotiomyces sp ASR H18 12A          | 307  | 1.E-82  |
| Leotiomyces sp F21                  | 321  | 7.E-87  |
| Leotiomyces sp genotype 134         | 364  | 6.E-100 |
| Leotiomyces sp NK264                | 462  | 2.E-129 |
| Leotiomyces sp NK264                | 366  | 3.E-100 |
| Leotiomyces sp NK264                | 431  | 6.E-120 |
| Leotiomyces sp NK266                | 420  | 2.E-116 |
| Lepraria aff obtusatica BRY C56005  | 93.5 | 3.E-18  |
| Lepraria elobata                    | 228  | 9.E-59  |
| Leptosphaeria doliolum              | 296  | 3.E-79  |
| Leptosphaeria korrae                | 351  | 5.E-96  |
| Leptosphaerulina chartarum          | 465  | 3.E-130 |
| Leptosphaerulina chartarum          | 455  | 4.E-127 |
| Leuconeurospora sp T11Cd2           | 377  | 1.E-103 |
| Limnoperdon incarnatum              | 257  | 1.E-67  |
| Linderina macrospora                | 71.3 | 2.E-11  |
| Lobaria retigera                    | 241  | 1.E-62  |
| Lobaria retigera                    | 195  | 8.E-49  |
| Lobariella pallida                  | 267  | 1.E-70  |
| Lophiostoma chamaecyparidis         | 374  | 1.E-102 |
| Lophiostoma chamaecyparidis         | 372  | 4.E-102 |
| Lophiostoma chamaecyparidis         | 318  | 5.E-86  |
| Lophiostoma chamaecyparidis         | 344  | 8.E-94  |
| Lophiostoma cynaroidis              | 294  | 8.E-79  |
| Lophodermium baculiferum            | 78.7 | 8.E-14  |
| Lophodermium conigenum              | 125  | 9.E-28  |
| Lophodermium conigenum              | 248  | 5.E-65  |
| Lophodermium pinastri               | 464  | 8.E-130 |
| Lophodermium pinastri               | 464  | 8.E-130 |
| Lophodermium pinastri               | 438  | 3.E-122 |
| Lophodermium pinastri               | 438  | 3.E-122 |
| Lophodermium seditiosum             | 451  | 5.E-126 |
| Lycoperdon aff pyriforme Scl 6 1 1L | 553  | 2.E-156 |
| Lyophyllum sp Cultivar Jpn          | 56.5 | 6.E-07  |
| Macroconia leptosphaeriae           | 250  | 1.E-65  |
| Macroconia leptosphaeriae           | 189  | 3.E-47  |
| Magnaporthe poae                    | 147  | 3.E-34  |
| Malassezia globosa                  | 462  | 3.E-129 |
| Malassezia globosa                  | 458  | 7.E-128 |
| Malassezia globosa                  | 554  | 6.E-157 |
| Malassezia globosa                  | 579  | 3.E-164 |
| Malassezia restricta                | 540  | 1.E-152 |
| Malassezia restricta                | 456  | 2.E-127 |
| Malassezia restricta                | 670  | 0.E+00  |
| Malassezia restricta                | 678  | 0.E+00  |

|                                   |      |         |
|-----------------------------------|------|---------|
| <i>Malassezia sympodialis</i>     | 110  | 1.E-23  |
| <i>Malassezia sympodialis</i>     | 651  | 0.E+00  |
| <i>Massariosphaeria typhicola</i> | 536  | 2.E-151 |
| <i>Melanelixia piliferella</i>    | 168  | 1.E-40  |
| <i>Melanocarpus albomyces</i>     | 386  | 2.E-106 |
| <i>Melanotaenium euphorbiae</i>   | 103  | 6.E-21  |
| <i>Melanotaenium euphorbiae</i>   | 103  | 6.E-21  |
| <i>Meliniomyces bicolor</i>       | 459  | 2.E-128 |
| <i>Meliniomyces bicolor</i>       | 307  | 1.E-82  |
| <i>Meliniomyces bicolor</i>       | 335  | 5.E-91  |
| <i>Meliniomyces bicolor</i>       | 374  | 1.E-102 |
| <i>Meliniomyces</i> sp GK 2010    | 183  | 2.E-45  |
| <i>Meliniomyces</i> sp SM7 2      | 392  | 3.E-108 |
| <i>Meliniomyces variabilis</i>    | 383  | 2.E-105 |
| <i>Meliniomyces vraolstadiae</i>  | 351  | 5.E-96  |
| <i>Metarhizium flavoviride</i>    | 340  | 1.E-92  |
| <i>Metschnikowia hawaiiensis</i>  | 87.2 | 2.E-16  |
| <i>Metschnikowia hawaiiensis</i>  | 87.2 | 2.E-16  |
| <i>Metschnikowia hawaiiensis</i>  | 87.2 | 2.E-16  |
| <i>Metschnikowia hawaiiensis</i>  | 87.2 | 2.E-16  |
| <i>Metschnikowia pulcherrima</i>  | 88.8 | 8.E-17  |
| <i>Micarea denigrata</i>          | 296  | 2.E-79  |
| <i>Micarea hedlundii</i>          | 225  | 8.E-58  |
| <i>Micarea hedlundii</i>          | 167  | 2.E-40  |
| <i>Micarea hedlundii</i>          | 161  | 8.E-39  |
| <i>Microdochium bolleyi</i>       | 391  | 6.E-108 |
| <i>Microdochium bolleyi</i>       | 379  | 2.E-104 |
| <i>Microscypha ellisii</i>        | 375  | 3.E-103 |
| <i>Microsphaeropsis arundinis</i> | 459  | 2.E-128 |
| <i>Microsphaeropsis arundinis</i> | 424  | 1.E-117 |
| <i>Microsphaeropsis arundinis</i> | 418  | 5.E-116 |
| <i>Mollisia incrustata</i>        | 237  | 1.E-61  |
| <i>Monoblepharis hypogyna</i>     | 183  | 2.E-45  |
| <i>Mortierella alpina</i>         | 285  | 5.E-76  |
| <i>Mortierella alpina</i>         | 182  | 6.E-45  |
| <i>Mortierella alpina</i>         | 573  | 1.E-162 |
| <i>Mortierella angusta</i>        | 617  | 6.E-176 |
| <i>Mortierella angusta</i>        | 514  | 8.E-145 |
| <i>Mortierella bainieri</i>       | 381  | 1.E-104 |
| <i>Mortierella bainieri</i>       | 276  | 5.E-73  |
| <i>Mortierella cystojenkinii</i>  | 603  | 2.E-171 |
| <i>Mortierella elongata</i>       | 353  | 1.E-96  |
| <i>Mortierella elongata</i>       | 427  | 7.E-119 |
| <i>Mortierella elongata</i>       | 636  | 0.E+00  |
| <i>Mortierella jenkinii</i>       | 141  | 2.E-32  |
| <i>Mortierella lignicola</i>      | 272  | 3.E-72  |
| <i>Mortierella lignicola</i>      | 605  | 4.E-172 |

|                             |      |         |
|-----------------------------|------|---------|
| Mortierella lignicola       | 612  | 3.E-174 |
| Mortierella macrocystis     | 595  | 3.E-169 |
| Mortierella parvispora      | 537  | 1.E-151 |
| Mortierella parvispora      | 616  | 2.E-175 |
| Mortierella polycephala     | 76.8 | 5.E-13  |
| Mortierella turficola       | 436  | 2.E-121 |
| Mortierellaceae sp PDKB9    | 610  | 1.E-173 |
| Mortierellaceae sp PDKB9    | 612  | 3.E-174 |
| Mucor moelleri              | 122  | 1.E-26  |
| Mycena arcangeliana         | 569  | 3.E-161 |
| Mycena arcangeliana         | 555  | 4.E-157 |
| Mycena corynephora          | 154  | 2.E-36  |
| Mycena epipterygia          | 562  | 3.E-159 |
| Mycena galopus              | 569  | 3.E-161 |
| Mycena galopus              | 560  | 9.E-159 |
| Mycena maurella             | 93.5 | 4.E-18  |
| Mycena meliigena            | 423  | 3.E-117 |
| Mycena metata               | 416  | 2.E-115 |
| Mycena simia                | 547  | 7.E-155 |
| Mycoblastus sanguinarioides | 202  | 4.E-51  |
| Myrmecridium banksiae       | 336  | 3.E-91  |
| Myrmecridium banksiae       | 402  | 3.E-111 |
| Myrmecridium banksiae       | 366  | 2.E-100 |
| Myrmecridium phragmitis     | 274  | 1.E-72  |
| Myrmecridium phragmitis     | 293  | 3.E-78  |
| Myrmecridium phragmitis     | 198  | 6.E-50  |
| Myrmecridium schulzeri      | 324  | 6.E-88  |
| Myrmecridium schulzeri      | 445  | 4.E-124 |
| Myrothecium gramineum       | 206  | 5.E-52  |
| NA1                         | NA   | NA      |
| NA10                        | NA   | NA      |
| NA11                        | NA   | NA      |
| NA12                        | NA   | NA      |
| NA13                        | NA   | NA      |
| NA14                        | NA   | NA      |
| NA15                        | NA   | NA      |
| NA16                        | NA   | NA      |
| NA17                        | NA   | NA      |
| NA18                        | NA   | NA      |
| NA19                        | NA   | NA      |
| NA2                         | NA   | NA      |
| NA20                        | NA   | NA      |
| NA21                        | NA   | NA      |
| NA22                        | NA   | NA      |
| NA23                        | NA   | NA      |
| NA24                        | NA   | NA      |
| NA25                        | NA   | NA      |

|                                      |      |         |
|--------------------------------------|------|---------|
| NA26                                 | NA   | NA      |
| NA27                                 | NA   | NA      |
| NA28                                 | NA   | NA      |
| NA29                                 | NA   | NA      |
| NA3                                  | NA   | NA      |
| NA30                                 | NA   | NA      |
| NA31                                 | NA   | NA      |
| NA32                                 | NA   | NA      |
| NA33                                 | NA   | NA      |
| NA34                                 | NA   | NA      |
| NA35                                 | NA   | NA      |
| NA36                                 | NA   | NA      |
| NA37                                 | NA   | NA      |
| NA38                                 | NA   | NA      |
| NA39                                 | NA   | NA      |
| NA4                                  | NA   | NA      |
| NA40                                 | NA   | NA      |
| NA41                                 | NA   | NA      |
| NA42                                 | NA   | NA      |
| NA43                                 | NA   | NA      |
| NA44                                 | NA   | NA      |
| NA45                                 | NA   | NA      |
| NA46                                 | NA   | NA      |
| NA47                                 | NA   | NA      |
| NA48                                 | NA   | NA      |
| NA49                                 | NA   | NA      |
| NA5                                  | NA   | NA      |
| NA50                                 | NA   | NA      |
| NA51                                 | NA   | NA      |
| NA6                                  | NA   | NA      |
| NA7                                  | NA   | NA      |
| NA8                                  | NA   | NA      |
| NA9                                  | NA   | NA      |
| <i>Naemacyclus niveus</i>            | 464  | 8.E-130 |
| <i>Neocallimastix</i> sp H GFM 2     | 96.7 | 4.E-19  |
| <i>Neocallimastix</i> sp H GFM 2     | 95.1 | 1.E-18  |
| <i>Neocallimastix</i> sp H GFM 2     | 95.1 | 9.E-19  |
| <i>Neocallimastix</i> sp H GFM 2     | 95.1 | 9.E-19  |
| <i>Neocallimastix</i> sp H GFM 2     | 77.7 | 2.E-13  |
| <i>Noosia banksiae</i>               | 388  | 7.E-107 |
| <i>Ochrolechia juvenalis</i>         | 153  | 2.E-36  |
| <i>Ogataea chonburiensis</i>         | 126  | 3.E-28  |
| <i>Oidiodendron</i>                  | NA   | NA      |
| <i>Oidiodendron chlamydosporicum</i> | 439  | 3.E-122 |
| <i>Oidiodendron chlamydosporicum</i> | 410  | 1.E-113 |
| <i>Oidiodendron chlamydosporicum</i> | 364  | 6.E-100 |
| <i>Oidiodendron chlamydosporicum</i> | 403  | 1.E-111 |



|                                     |      |         |
|-------------------------------------|------|---------|
| <i>Oidiodendron griseum</i>         | 324  | 6.E-88  |
| <i>Oidiodendron griseum</i>         | 280  | 2.E-74  |
| <i>Oidiodendron pilicola</i>        | 435  | 3.E-121 |
| <i>Oidiodendron pilicola</i>        | 392  | 3.E-108 |
| <i>Oidiodendron reticulatum</i>     | 454  | 6.E-127 |
| <i>Oidiodendron reticulatum</i>     | 425  | 3.E-118 |
| <i>Oidiodendron tenuissimum</i>     | 97.1 | 2.E-19  |
| <i>Ophiocordyceps entomorrhiza</i>  | 148  | 5.E-35  |
| <i>Ophiocordyceps irangiensis</i>   | 63.4 | 4.E-09  |
| <i>Ophiocordyceps irangiensis</i>   | 60.2 | 3.E-08  |
| <i>Ophiocordyceps nutans</i>        | 95.1 | 8.E-19  |
| <i>Ophiocordyceps nutans</i>        | 98.3 | 1.E-19  |
| <i>Ophiocordyceps prolifica</i>     | 502  | 3.E-141 |
| <i>Ophiostoma bicolor</i>           | 99.9 | 5.E-20  |
| <i>Paraconiothyrium brasiliense</i> | 145  | 7.E-34  |
| <i>Paraconiothyrium sporulosum</i>  | 455  | 4.E-127 |
| <i>Paraphaeosphaeria michotii</i>   | 383  | 1.E-105 |
| <i>Parastagonospora nodorum</i>     | 355  | 6.E-97  |
| <i>Parastagonospora nodorum</i>     | 361  | 7.E-99  |
| <i>Passalora zambiae</i>            | 252  | 5.E-66  |
| <i>Penicillium aculeatum</i>        | 457  | 1.E-127 |
| <i>Penicillium adametzii</i>        | 494  | 7.E-139 |
| <i>Penicillium adametzii</i>        | 473  | 1.E-132 |
| <i>Penicillium bialowiezense</i>    | 423  | 2.E-117 |
| <i>Penicillium brevicompactum</i>   | 228  | 9.E-59  |
| <i>Penicillium canescens</i>        | 394  | 6.E-109 |
| <i>Penicillium canescens</i>        | 480  | 1.E-134 |
| <i>Penicillium canescens</i>        | 473  | 1.E-132 |
| <i>Penicillium cecidicola</i>       | 364  | 8.E-100 |
| <i>Penicillium cecidicola</i>       | 477  | 8.E-134 |
| <i>Penicillium citreonigrum</i>     | 393  | 2.E-108 |
| <i>Penicillium concentricum</i>     | 150  | 2.E-35  |
| <i>Penicillium corylophilum</i>     | 483  | 2.E-135 |
| <i>Penicillium herquei</i>          | 351  | 5.E-96  |
| <i>Penicillium janthinellum</i>     | 412  | 4.E-114 |
| <i>Penicillium lanosum</i>          | 492  | 2.E-138 |
| <i>Penicillium montanense</i>       | 394  | 6.E-109 |
| <i>Penicillium montanense</i>       | 483  | 2.E-135 |
| <i>Penicillium montanense</i>       | 490  | 1.E-137 |
| <i>Penicillium montanense</i>       | 460  | 8.E-129 |
| <i>Penicillium montanense</i>       | 399  | 2.E-110 |
| <i>Penicillium namyslowskii</i>     | 494  | 7.E-139 |
| <i>Penicillium namyslowskii</i>     | 468  | 5.E-131 |
| <i>Penicillium ochrochloron</i>     | 391  | 6.E-108 |
| <i>Penicillium ochrochloron</i>     | 497  | 8.E-140 |
| <i>Penicillium raistrickii</i>      | 403  | 1.E-111 |
| <i>Penicillium simile</i>           | 422  | 4.E-117 |

|                                      |      |         |
|--------------------------------------|------|---------|
| <i>Penicillium tularense</i>         | 423  | 2.E-117 |
| <i>Penicillium tularense</i>         | 394  | 8.E-109 |
| <i>Penidiella ellipsoidea</i>        | 147  | 1.E-34  |
| <i>Peniophora lycii</i>              | 444  | 9.E-124 |
| <i>Pesotum fragrans</i>              | 82.4 | 5.E-15  |
| <i>Pezicula carpinea</i>             | 258  | 8.E-68  |
| <i>Peziza ostracoderma</i>           | 269  | 4.E-71  |
| <i>Peziza ostracoderma</i>           | 448  | 7.E-125 |
| <i>Pezizella discreta</i>            | 294  | 7.E-79  |
| <i>Pezizomyces</i> sp genotype 454   | 443  | 1.E-123 |
| <i>Phaeoacremonium griseorubrum</i>  | 224  | 1.E-57  |
| <i>Phaeococcomyces catenatus</i>     | 542  | 4.E-153 |
| <i>Phaeococcomyces catenatus</i>     | 256  | 3.E-67  |
| <i>Phaeococcomyces chersonesos</i>   | 201  | 1.E-50  |
| <i>Phaeococcomyces eucalypti</i>     | 168  | 1.E-40  |
| <i>Phaeococcomyces eucalypti</i>     | 307  | 1.E-82  |
| <i>Phaeococcomyces eucalypti</i>     | 299  | 3.E-80  |
| <i>Phaeococcomyces nigricans</i>     | 381  | 5.E-105 |
| <i>Phaeococcomyces nigricans</i>     | 335  | 5.E-91  |
| <i>Phaeosphaeria avenaria</i>        | 453  | 2.E-126 |
| <i>Phaeosphaeria avenaria</i>        | 425  | 3.E-118 |
| <i>Phaeosphaeria herpotrichoides</i> | 449  | 2.E-125 |
| <i>Phaeosphaeria nodorum</i>         | 451  | 5.E-126 |
| <i>Phaeosphaeria nodorum</i>         | 449  | 2.E-125 |
| <i>Phaeosphaeria nodorum</i>         | 405  | 4.E-112 |
| <i>Phaeosphaeria phragmitis</i>      | 380  | 2.E-104 |
| <i>Phaeosphaeria phragmitis</i>      | 414  | 6.E-115 |
| <i>Phaeosphaeria phragmitis</i>      | 363  | 2.E-99  |
| <i>Phaeosphaeriopsis</i> sp C652     | 453  | 2.E-126 |
| <i>Phaeosphaeriopsis</i> sp TMS 2011 | 323  | 2.E-87  |
| <i>Phaeotheca fissurella</i>         | 377  | 8.E-104 |
| <i>Phellinopsis conchata</i>         | 183  | 2.E-45  |
| <i>Phellinus pomaceus</i>            | 91.9 | 1.E-17  |
| <i>Phialemonium curvatum</i>         | 266  | 3.E-70  |
| <i>Phialemonium curvatum</i>         | 236  | 3.E-61  |
| <i>Phialemonium curvatum</i>         | 275  | 5.E-73  |
| <i>Phialemonium curvatum</i>         | 256  | 3.E-67  |
| <i>Phialemonium curvatum</i>         | 247  | 2.E-64  |
| <i>Phialemonium curvatum</i>         | 202  | 5.E-51  |
| <i>Phialocephala fortinii</i>        | 393  | 2.E-108 |
| <i>Phialocephala fortinii</i>        | 369  | 3.E-101 |
| <i>Phialocephala fortinii</i>        | 436  | 1.E-121 |
| <i>Phialocephala fusca</i>           | 396  | 2.E-109 |
| <i>Phialocephala virens</i>          | 275  | 4.E-73  |
| <i>Phialocephala virens</i>          | 337  | 1.E-91  |
| <i>Phialophora lignicola</i>         | 336  | 3.E-91  |
| <i>Phialophora phaeophora</i>        | 532  | 2.E-150 |

|                                  |      |         |
|----------------------------------|------|---------|
| Phialophora sp DF36              | 446  | 1.E-124 |
| Phialophora sp DF36              | 416  | 2.E-115 |
| Phlebia livida subsp tuberculata | 161  | 1.E-38  |
| Phlyctochytrium africanum        | 195  | 1.E-48  |
| Phlyctochytrium palustre         | 180  | 3.E-44  |
| Pholiota populnea                | 573  | 1.E-162 |
| Phoma betae                      | 292  | 3.E-78  |
| Phoma caloplacae                 | 396  | 3.E-109 |
| Phoma caloplacae                 | 337  | 1.E-91  |
| Phoma herbarum                   | 294  | 8.E-79  |
| Phoma macrostoma                 | 320  | 1.E-86  |
| Phyllachora phyllostachydis      | 345  | 5.E-94  |
| Pichia kudriavzevii              | 57.1 | 3.E-07  |
| Piriformospora sp X 30           | 90.3 | 3.E-17  |
| Piriformospora sp X 30           | 90.3 | 3.E-17  |
| Piriformospora sp X 30           | 90.3 | 3.E-17  |
| Placynthiella icmalea            | 442  | 4.E-123 |
| Placynthiella icmalea            | 401  | 5.E-111 |
| Platismatia stenophylla          | 320  | 2.E-86  |
| Plectania rhytidia               | 104  | 2.E-21  |
| Pleopsidium chlorophanum         | 187  | 3.E-46  |
| Pleospora herbarum               | 446  | 2.E-124 |
| Pleosporales sp 28e              | 185  | 9.E-46  |
| Pleosporales sp 28e              | 410  | 1.E-113 |
| Pleosporales sp 28e              | 355  | 4.E-97  |
| Pleosporales sp 5 TMS 2011       | 190  | 2.E-47  |
| Pochonia bulbillosa              | 364  | 7.E-100 |
| Pochonia bulbillosa              | 527  | 7.E-149 |
| Pochonia bulbillosa              | 512  | 2.E-144 |
| Pochonia suchlasporia            | 329  | 2.E-89  |
| Podoscypha venustula             | 96.7 | 5.E-19  |
| Podospora ellisiana              | 278  | 4.E-74  |
| Podospora ellisiana              | 413  | 1.E-114 |
| Podospora ellisiana              | 363  | 2.E-99  |
| Podospora formosana              | 448  | 5.E-125 |
| Podospora miniglutinans          | 420  | 1.E-116 |
| Polyphlyctis unispina            | 161  | 1.E-38  |
| Porosphaerella cordanophora      | 321  | 7.E-87  |
| Porosphaerella cordanophora      | 263  | 3.E-69  |
| Porosphaerella cordanophora      | 222  | 4.E-57  |
| Powellomyces hirtus              | 79.2 | 7.E-14  |
| Powellomyces hirtus              | 93.5 | 5.E-18  |
| Powellomyces hirtus              | 82.4 | 1.E-14  |
| Powellomyces hirtus              | 82.4 | 1.E-14  |
| Preussia australis               | 470  | 1.E-131 |
| Preussia dubia                   | 415  | 5.E-115 |
| Preussia minima                  | 343  | 1.E-93  |

|                                    |      |         |
|------------------------------------|------|---------|
| <i>Pringsheimia euphorbiae</i>     | 294  | 8.E-79  |
| <i>Pseudocercospora fraxini</i>    | 296  | 2.E-79  |
| <i>Pseudocercospora fraxini</i>    | 367  | 1.E-100 |
| <i>Pseudocercospora fraxini</i>    | 327  | 8.E-89  |
| <i>Pyrenochaetopsis microspora</i> | 435  | 3.E-121 |
| <i>Pyrenochaetopsis microspora</i> | 392  | 3.E-108 |
| <i>Pyrenophora tetarrhenae</i>     | 272  | 3.E-72  |
| <i>Pyrenula macrospora</i>         | 115  | 7.E-25  |
| <i>Pyxine limbulata</i>            | 99   | 7.E-20  |
| <i>Rachicladosporium pini</i>      | 443  | 1.E-123 |
| <i>Rachicladosporium pini</i>      | 420  | 1.E-116 |
| <i>Ramaria abietina</i>            | 111  | 8.E-24  |
| <i>Ramichloridium strelitziae</i>  | 252  | 5.E-66  |
| <i>Rhexocercosporidium panacis</i> | 461  | 7.E-129 |
| <i>Rhexocercosporidium panacis</i> | 431  | 6.E-120 |
| <i>Rhizophlyctis harderi</i>       | 86.1 | 7.E-16  |
| <i>Rhizophlyctis rosea</i>         | 320  | 2.E-86  |
| <i>Rhizophlyctis rosea</i>         | 605  | 4.E-172 |
| <i>Rhizophlyctis rosea</i>         | 172  | 6.E-42  |
| <i>Rhizophlyctis rosea</i>         | 163  | 2.E-39  |
| <i>Rhizophlyctis rosea</i>         | 562  | 3.E-159 |
| <i>Rhizophlyctis rosea</i>         | 80.5 | 3.E-14  |
| <i>Rhizophlyctis rosea</i>         | 86.1 | 8.E-16  |
| <i>Rhizophydium globosum</i>       | 82.4 | 9.E-15  |
| <i>Rhizophydium globosum</i>       | 82.4 | 9.E-15  |
| <i>Rhizophydium laterale</i>       | 82.4 | 8.E-15  |
| <i>Rhizophydium</i> sp JEL 385     | 78.7 | 9.E-14  |
| <i>Rhizoplaca chrysoleuca</i>      | 110  | 2.E-23  |
| <i>Rhizopogon luteolus</i>         | 654  | 0.E+00  |
| <i>Rhizopogon luteolus</i>         | 567  | 9.E-161 |
| <i>Rhizopogon luteolus</i>         | 654  | 0.E+00  |
| <i>Rhizopycnis vagum</i>           | 87.2 | 2.E-16  |
| <i>Rhizoscyphus ericae</i>         | 367  | 8.E-101 |
| <i>Rhizoscyphus ericae</i>         | 302  | 3.E-81  |
| <i>Rhizoscyphus ericae</i>         | 307  | 1.E-82  |
| <i>Rhizoscyphus ericae</i>         | 374  | 1.E-102 |
| <i>Rhizoscyphus ericae</i>         | 458  | 6.E-128 |
| <i>Rhizoscyphus ericae</i>         | 367  | 8.E-101 |
| <i>Rhizoscyphus ericae</i>         | 407  | 1.E-112 |
| <i>Rhizoscyphus ericae</i>         | 446  | 1.E-124 |
| <i>Rhizoscyphus ericae</i>         | 415  | 5.E-115 |
| <i>Rhizoscyphus ericae</i>         | 459  | 2.E-128 |
| <i>Rhizoscyphus ericae</i>         | 439  | 3.E-122 |
| <i>Rhizoscyphus ericae</i>         | 408  | 4.E-113 |
| <i>Rhizoscyphus ericae</i>         | 507  | 1.E-142 |
| <i>Rhizoscyphus ericae</i>         | 370  | 1.E-101 |
| <i>Rhizoscyphus ericae</i>         | 427  | 7.E-119 |

|                                      |      |         |
|--------------------------------------|------|---------|
| <i>Rhizoscyphus ericae</i>           | 337  | 1.E-91  |
| <i>Rhizoscyphus ericae</i>           | 399  | 3.E-110 |
| <i>Rhizoscyphus ericae</i>           | 236  | 4.E-61  |
| <i>Rhizoscyphus ericae</i>           | 413  | 1.E-114 |
| <i>Rhizoscyphus ericae</i>           | 412  | 4.E-114 |
| <i>Rhizoscyphus ericae</i>           | 339  | 4.E-92  |
| <i>Rhizoscyphus ericae</i>           | 420  | 2.E-116 |
| <i>Rhizoscyphus ericae</i>           | 369  | 3.E-101 |
| <i>Rhizoscyphus ericae</i>           | 418  | 5.E-116 |
| <i>Rhizoscyphus ericae</i>           | 313  | 2.E-84  |
| <i>Rhizoscyphus ericae</i>           | 385  | 5.E-106 |
| <i>Rhizoscyphus ericae</i>           | 424  | 1.E-117 |
| <i>Rhizoscyphus ericae</i>           | 368  | 5.E-101 |
| <i>Rhizoscyphus ericae</i>           | 374  | 1.E-102 |
| <i>Rhizoscyphus ericae</i>           | 407  | 1.E-112 |
| <i>Rhizoscyphus ericae</i>           | 433  | 2.E-120 |
| <i>Rhizoscyphus ericae</i>           | 411  | 8.E-114 |
| <i>Rhizoscyphus ericae</i>           | 366  | 1.E-100 |
| <i>Rhizoscyphus ericae</i>           | 337  | 1.E-91  |
| <i>Rhizoscyphus ericae</i>           | 433  | 2.E-120 |
| <i>Rhizoscyphus ericae</i>           | 374  | 1.E-102 |
| <i>Rhizoscyphus ericae</i>           | 292  | 3.E-78  |
| <i>Rhizoscyphus ericae</i>           | 383  | 2.E-105 |
| <i>Rhizoscyphus ericae</i>           | 350  | 2.E-95  |
| <i>Rhizoscyphus ericae</i>           | 422  | 4.E-117 |
| <i>Rhizoscyphus ericae</i>           | 350  | 2.E-95  |
| <i>Rhizoscyphus ericae</i>           | 379  | 2.E-104 |
| <i>Rhizoscyphus ericae</i>           | 368  | 4.E-101 |
| <i>Rhodosporidium babjevae</i>       | 340  | 1.E-92  |
| <i>Rhodotorula bloemfonteinensis</i> | 329  | 3.E-89  |
| <i>Rhodotorula bloemfonteinensis</i> | 309  | 4.E-83  |
| <i>Rhodotorula cassiicola</i>        | 257  | 1.E-67  |
| <i>Rhodotorula eucalyptica</i>       | 386  | 2.E-106 |
| <i>Rhodotorula glutinis</i>          | 483  | 2.E-135 |
| <i>Rhodotorula mucilaginosa</i>      | 578  | 4.E-164 |
| <i>Rhynchostoma proteae</i>          | 86.1 | 7.E-16  |
| <i>Rhynchostoma proteae</i>          | 86.1 | 7.E-16  |
| <i>Rhynchostoma proteae</i>          | 86.1 | 5.E-16  |
| <i>Rufoplaca tristiuscula</i>        | 185  | 6.E-46  |
| <i>Saccharata intermedia</i>         | 125  | 1.E-27  |
| <i>Sagenomella diversispora</i>      | 448  | 6.E-125 |
| <i>Sagenomella humicola</i>          | 489  | 2.E-137 |
| <i>Sagenomella humicola</i>          | 460  | 8.E-129 |
| <i>Sagenomella striatispora</i>      | 462  | 2.E-129 |
| <i>Sagenomella striatispora</i>      | 431  | 9.E-120 |
| <i>Sarcoscypha hosoyae</i>           | 180  | 2.E-44  |
| <i>Sarea difformis</i>               | 163  | 4.E-39  |

|                                        |      |         |
|----------------------------------------|------|---------|
| <i>Sarea resinae</i>                   | 155  | 6.E-37  |
| <i>Sarea resinae</i>                   | 442  | 4.E-123 |
| <i>Scedosporium apiospermum</i>        | 388  | 5.E-107 |
| <i>Schizothecium glutinans</i>         | 271  | 1.E-71  |
| <i>Sclerotium delphinii</i>            | 63.9 | 3.E-09  |
| <i>Scolecobasidium terreum</i>         | 183  | 2.E-45  |
| <i>Scorias leucadendri</i>             | 165  | 6.E-40  |
| <i>Scutellospora calospora</i>         | 316  | 2.E-85  |
| <i>Scutellospora calospora</i>         | 277  | 1.E-73  |
| <i>Scytalidium vaccinii</i>            | 316  | 1.E-85  |
| <i>Sebacina grisea</i>                 | 91.6 | 1.E-17  |
| <i>Septoria digitalis</i>              | 305  | 4.E-82  |
| <i>Septoria escalloniae</i>            | 222  | 4.E-57  |
| <i>Septoria lamii</i>                  | 350  | 2.E-95  |
| <i>Sesquicillium microsporum</i>       | 418  | 4.E-116 |
| <i>Sesquicillium microsporum</i>       | 150  | 2.E-35  |
| <i>Siphula ceratites</i>               | 156  | 3.E-37  |
| <i>Siphula ceratites</i>               | 156  | 3.E-37  |
| <i>Siphula ceratites</i>               | 158  | 1.E-37  |
| <i>Siphula ceratites</i>               | 156  | 4.E-37  |
| <i>Siphula ceratites</i>               | 183  | 2.E-45  |
| <i>Sistotrema diademiferum</i>         | 290  | 3.E-77  |
| <i>Sistotrema diademiferum</i>         | 206  | 5.E-52  |
| <i>Sistotrema sp B216</i>              | 526  | 2.E-148 |
| <i>Sistotrema sp B216</i>              | 490  | 1.E-137 |
| <i>Sistotrema sp B216</i>              | 440  | 1.E-122 |
| <i>Sistotrema sp.</i>                  | 339  | 3.E-92  |
| <i>Skyttea nitschkei</i>               | 283  | 2.E-75  |
| <i>Sordaria fimicola</i>               | 389  | 2.E-107 |
| <i>Sordaria fimicola</i>               | 446  | 2.E-124 |
| <i>Sordariales sp Pi GPB</i>           | 261  | 9.E-69  |
| <i>Sordariomycetes sp 11344</i>        | 418  | 5.E-116 |
| <i>Sordariomycetes sp DC2118</i>       | 467  | 9.E-131 |
| <i>Sordariomycetes sp DC2118</i>       | 435  | 5.E-121 |
| <i>Sordariomycetes sp genotype 106</i> | 228  | 8.E-59  |
| <i>Sorocybe resinae</i>                | 234  | 1.E-60  |
| <i>Spadicoides bina</i>                | 196  | 3.E-49  |
| <i>Spadicoides bina</i>                | 212  | 4.E-54  |
| <i>Sphaerobolus iowensis</i>           | 569  | 2.E-161 |
| <i>Sphaeropsis pyriputrescens</i>      | 326  | 3.E-88  |
| <i>Sphaeropsis sapinea</i>             | 464  | 6.E-130 |
| <i>Spizellomyces acuminatus</i>        | 152  | 1.E-35  |
| <i>Spizellomyces dolichospermus</i>    | 294  | 8.E-79  |
| <i>Spizellomyces dolichospermus</i>    | 211  | 1.E-53  |
| <i>Spizellomyces lactosolyticus</i>    | 121  | 2.E-26  |
| <i>Spizellomyces palustris</i>         | 209  | 7.E-53  |
| <i>Spizellomyces plurigibbosus</i>     | 163  | 3.E-39  |

|                                        |      |         |
|----------------------------------------|------|---------|
| <i>Spizellomyces plurigibbosus</i>     | 102  | 7.E-21  |
| <i>Spizellomyces pseudodichotomus</i>  | 264  | 1.E-69  |
| <i>Spizellomyces pseudodichotomus</i>  | 183  | 3.E-45  |
| <i>Spizellomyces pseudodichotomus</i>  | 93.5 | 6.E-18  |
| <i>Spizellomyces pseudodichotomus</i>  | 102  | 8.E-21  |
| <i>Spizellomyces pseudodichotomus</i>  | 89.8 | 7.E-17  |
| <i>Spizellomyces pseudodichotomus</i>  | 152  | 7.E-36  |
| <i>Spizellomyces</i> sp JEL 148        | 80.8 | 3.E-14  |
| <i>Sporendocladia foliicola</i>        | 269  | 3.E-71  |
| <i>Sporobolomyces gracilis</i>         | 553  | 2.E-156 |
| <i>Sporobolomyces inositophilus</i>    | 445  | 5.E-124 |
| <i>Sporobolomyces lactophilus</i>      | 290  | 3.E-77  |
| <i>Sporobolomyces lactophilus</i>      | 263  | 3.E-69  |
| <i>Sporobolomyces tsugae</i>           | 499  | 3.E-140 |
| <i>Sporormiella</i> sp FBI04           | 472  | 3.E-132 |
| <i>Squamarina gypsacea</i>             | 180  | 2.E-44  |
| <i>Staphylotrichum boninense</i>       | 232  | 2.E-60  |
| <i>Stictis radiata</i>                 | 291  | 9.E-78  |
| <i>Stictis radiata</i>                 | 282  | 6.E-75  |
| <i>Stictis radiata</i>                 | 200  | 2.E-50  |
| <i>Stictis radiata</i>                 | 217  | 2.E-55  |
| <i>Stictis radiata</i>                 | 241  | 1.E-62  |
| <i>Stilbum vulgare</i>                 | 123  | 2.E-27  |
| <i>Strelitziana mali</i>               | 247  | 2.E-64  |
| <i>Stropharia cyanea</i>               | 553  | 2.E-156 |
| <i>Suillus bovinus</i>                 | 611  | 5.E-174 |
| <i>Suillus luteus</i>                  | 446  | 1.E-124 |
| <i>Suillus luteus</i>                  | 611  | 5.E-174 |
| <i>Suillus luteus</i>                  | 608  | 4.E-173 |
| <i>Sydowia polyspora</i>               | 488  | 6.E-137 |
| <i>Sydowia polyspora</i>               | 464  | 6.E-130 |
| <i>Sympodiella acicola</i>             | 464  | 8.E-130 |
| <i>Sympodiella acicola</i>             | 433  | 2.E-120 |
| <i>Syzygospora bachmannii</i>          | 291  | 1.E-77  |
| <i>Syzygospora effibulata</i>          | 108  | 1.E-22  |
| <i>Talaromyces verruculosus</i>        | 374  | 1.E-102 |
| <i>Talaromyces verruculosus</i>        | 396  | 2.E-109 |
| <i>Talaromyces verruculosus</i>        | 480  | 1.E-134 |
| <i>Talaromyces wortmannii</i>          | 480  | 1.E-134 |
| <i>Teratosphaeria capensis</i>         | 477  | 1.E-133 |
| <i>Teratosphaeria capensis</i>         | 442  | 4.E-123 |
| <i>Teratosphaeria capensis</i>         | 453  | 1.E-126 |
| <i>Teratosphaeria jonkershoekensis</i> | 394  | 8.E-109 |
| <i>Teratosphaeria persoonii</i>        | 136  | 3.E-31  |
| <i>Thelephora</i>                      | 581  | 5.E-165 |
| <i>Thelephora terrestris</i>           | 431  | 8.E-120 |
| <i>Thelephora terrestris</i>           | 577  | 1.E-163 |

|                                     |      |         |
|-------------------------------------|------|---------|
| <i>Thelotrema lepadinum</i>         | 71.3 | 1.E-11  |
| <i>Thielavia fragilis</i>           | 348  | 5.E-95  |
| <i>Thielavia fragilis</i>           | 285  | 4.E-76  |
| <i>Tolypocladium cylindrosporum</i> | 451  | 5.E-126 |
| <i>Tolypocladium inflatum</i>       | 434  | 1.E-120 |
| <i>Trechispora hymenocystis</i>     | 390  | 1.E-107 |
| <i>Trechispora stevensonii</i>      | 183  | 2.E-45  |
| <i>Trechispora stevensonii</i>      | 418  | 7.E-116 |
| <i>Trechispora stevensonii</i>      | 399  | 2.E-110 |
| <i>Trechispora subsphaerospora</i>  | 423  | 2.E-117 |
| <i>Trechispora subsphaerospora</i>  | 370  | 1.E-101 |
| <i>Trechispora subsphaerospora</i>  | 374  | 1.E-102 |
| <i>Tremella brasiliensis</i>        | 206  | 4.E-52  |
| <i>Tremella diploschistina</i>      | 225  | 8.E-58  |
| <i>Tremella diploschistina</i>      | 215  | 6.E-55  |
| <i>Tremella giraffa</i>             | 240  | 2.E-62  |
| <i>Tremella taiwanensis</i>         | 126  | 3.E-28  |
| <i>Trichocladium asperum</i>        | 375  | 3.E-103 |
| <i>Trichoderma atroviride</i>       | 38   | 1.E-01  |
| <i>Trichoderma koningiopsis</i>     | 481  | 6.E-135 |
| <i>Trichoderma petersenii</i>       | 412  | 4.E-114 |
| <i>Trichomerium deniquilatum</i>    | 434  | 1.E-120 |
| <i>Trichomerium gleosporum</i>      | 331  | 1.E-89  |
| <i>Trichopezizella otanii</i>       | 176  | 3.E-43  |
| <i>Trichosporon debeurmannianum</i> | 147  | 3.E-34  |
| <i>Trichosporon porosum</i>         | 494  | 7.E-139 |
| <i>Trichosporon porosum</i>         | 431  | 9.E-120 |
| <i>Trichosporon porosum</i>         | 473  | 1.E-132 |
| <i>Trichothecium roseum</i>         | 133  | 6.E-30  |
| <i>Tricladium chaetocladium</i>     | 191  | 9.E-48  |
| <i>Truncatella angustata</i>        | 462  | 2.E-129 |
| <i>Tuber cistophilum</i>            | 85.6 | 7.E-16  |
| <i>Tuber cistophilum</i>            | 90.3 | 3.E-17  |
| <i>Tuber cistophilum</i>            | 85.6 | 7.E-16  |
| <i>Umbelopsis autotrophica</i>      | 548  | 5.E-155 |
| <i>Umbelopsis autotrophica</i>      | 536  | 1.E-151 |
| <i>Umbelopsis isabellina</i>        | 394  | 9.E-109 |
| <i>Umbelopsis isabellina</i>        | 543  | 1.E-153 |
| <i>Umbelopsis isabellina</i>        | 357  | 1.E-97  |
| <i>Umbelopsis isabellina</i>        | 529  | 2.E-149 |
| <i>Umbelopsis isabellina</i>        | 497  | 7.E-140 |
| <i>Umbelopsis ramanniana</i>        | 548  | 5.E-155 |
| <i>Umbelopsis ramanniana</i>        | 534  | 5.E-151 |
| <i>Umbelopsis ramanniana</i>        | 540  | 1.E-152 |
| <i>Umbelopsis</i> sp I GK 2010      | 226  | 2.E-58  |
| <i>Umbilicaria calvescens</i>       | 218  | 6.E-56  |
| <i>Umbilicaria calvescens</i>       | 242  | 5.E-63  |



|                                   |      |         |
|-----------------------------------|------|---------|
| uncultured Archaeospora           | 488  | 6.E-137 |
| uncultured Archaeospora           | 520  | 1.E-146 |
| uncultured Archaeosporales        | 470  | 1.E-131 |
| uncultured Archaeosporales        | 580  | 1.E-164 |
| uncultured Archaeosporales        | 445  | 4.E-124 |
| uncultured Archaeosporales        | 507  | 1.E-142 |
| uncultured Archaeosporales        | 555  | 4.E-157 |
| uncultured Archaeosporales        | 484  | 5.E-136 |
| uncultured Archaeosporales        | NA   | NA      |
| uncultured Archaeosporales        | 531  | 7.E-150 |
| uncultured Chytridiaceae          | 52.8 | 8.E-06  |
| uncultured Cladosporium           | 446  | 2.E-124 |
| uncultured Cladosporium           | 407  | 1.E-112 |
| uncultured Cladosporium           | 470  | 1.E-131 |
| uncultured Dermateaceae           | 438  | 4.E-122 |
| uncultured Dermateaceae           | 399  | 2.E-110 |
| uncultured ectomycorrhizal fungus | 386  | 2.E-106 |
| uncultured ectomycorrhizal fungus | 73.1 | 6.E-12  |
| uncultured fungus                 | 366  | 2.E-100 |
| uncultured fungus                 | 353  | 1.E-96  |
| uncultured fungus                 | 361  | 6.E-99  |
| uncultured fungus                 | 358  | 5.E-98  |
| uncultured fungus                 | 196  | 3.E-49  |
| uncultured fungus                 | 576  | 1.E-163 |
| uncultured fungus                 | 169  | 5.E-41  |
| uncultured fungus                 | 391  | 7.E-108 |
| uncultured fungus                 | 220  | 2.E-56  |
| uncultured fungus                 | 185  | 1.E-45  |
| uncultured fungus                 | 569  | 2.E-161 |
| uncultured fungus                 | 237  | 1.E-61  |
| uncultured fungus                 | 211  | 9.E-54  |
| uncultured fungus                 | 418  | 5.E-116 |
| uncultured fungus                 | 357  | 1.E-97  |
| uncultured fungus                 | 324  | 2.E-87  |
| uncultured fungus                 | 292  | 5.E-78  |
| uncultured fungus                 | 95.3 | 8.E-19  |
| uncultured fungus                 | 54.7 | 2.E-06  |
| uncultured fungus                 | 95.3 | 1.E-18  |
| uncultured fungus                 | 54.7 | 2.E-06  |
| uncultured fungus                 | 56.5 | 5.E-07  |
| uncultured fungus                 | 56.5 | 5.E-07  |
| uncultured fungus                 | 54.7 | 2.E-06  |
| uncultured fungus                 | 102  | 5.E-21  |
| uncultured fungus                 | 60.2 | 6.E-08  |
| uncultured fungus                 | 56.5 | 5.E-07  |
| uncultured fungus                 | 451  | 7.E-126 |
| uncultured fungus                 | 556  | 1.E-157 |

|                                                     |      |         |
|-----------------------------------------------------|------|---------|
| uncultured fungus                                   | 337  | 2.E-91  |
| uncultured fungus                                   | 309  | 4.E-83  |
| uncultured fungus                                   | 95.3 | 8.E-19  |
| uncultured fungus                                   | 339  | 3.E-92  |
| uncultured fungus                                   | 267  | 1.E-70  |
| uncultured fungus                                   | 280  | 2.E-74  |
| uncultured fungus                                   | 421  | 6.E-117 |
| uncultured fungus                                   | 442  | 4.E-123 |
| uncultured fungus                                   | 150  | 2.E-35  |
| uncultured fungus                                   | 664  | 0.E+00  |
| uncultured fungus                                   | 56.5 | 5.E-07  |
| uncultured fungus                                   | 305  | 6.E-82  |
| uncultured fungus                                   | 250  | 3.E-65  |
| uncultured fungus                                   | 298  | 1.E-79  |
| uncultured fungus                                   | 363  | 2.E-99  |
| uncultured fungus                                   | 551  | 5.E-156 |
| uncultured fungus                                   | 87.9 | 1.E-16  |
| uncultured fungus                                   | 158  | 9.E-38  |
| uncultured fungus                                   | 400  | 8.E-111 |
| uncultured Helotiaceae                              | 418  | 5.E-116 |
| uncultured Helotiaceae                              | 453  | 2.E-126 |
| uncultured Hypocreales                              | 87.9 | 1.E-16  |
| uncultured Leotiomyces                              | 462  | 2.E-129 |
| uncultured Leptodontidium                           | 469  | 3.E-131 |
| uncultured Mortierella                              | 183  | 3.E-45  |
| uncultured Phaeococcomyces                          | 229  | 3.E-59  |
| uncultured Phialophora                              | 367  | 8.E-101 |
| uncultured Sebacina                                 | 489  | 2.E-137 |
| uncultured Sebacina mycobiont of Trifolium pratense | 418  | 5.E-116 |
| uncultured Sebacinaceae                             | 497  | 7.E-140 |
| uncultured soil fungus                              | 432  | 3.E-120 |
| uncultured soil fungus                              | 600  | 1.E-170 |
| uncultured soil fungus                              | 499  | 3.E-140 |
| uncultured soil fungus                              | 95.1 | 1.E-18  |
| uncultured soil fungus                              | 481  | 7.E-135 |
| uncultured soil fungus                              | 115  | 1.E-24  |
| uncultured soil fungus                              | 93.5 | 3.E-18  |
| uncultured soil fungus                              | 223  | 3.E-57  |
| uncultured soil fungus                              | 73.1 | 6.E-12  |
| uncultured soil fungus                              | 388  | 6.E-107 |
| uncultured soil fungus                              | 99.9 | 6.E-20  |
| uncultured soil fungus                              | 610  | 1.E-173 |
| uncultured Trechisporales                           | 554  | 6.E-157 |
| uncultured Trechisporales                           | 429  | 2.E-119 |
| uncultured Trechisporales                           | 547  | 7.E-155 |
| Unguiculariopsis lettaui                            | 200  | 2.E-50  |
| Urocystis agropyri                                  | 619  | 2.E-176 |

|                                         |      |         |
|-----------------------------------------|------|---------|
| <i>Vermispora fusarina</i>              | 104  | 2.E-21  |
| <i>Vermispora fusarina</i>              | 263  | 4.E-69  |
| <i>Vermispora fusarina</i>              | 84.2 | 3.E-15  |
| <i>Verrucaria subcrustosa</i>           | 231  | 1.E-59  |
| <i>Verrucariales</i> sp RB 2011         | 241  | 1.E-62  |
| <i>Verticillium leptobactrum</i>        | 518  | 5.E-146 |
| <i>Wallemia sebi</i>                    | 109  | 8.E-23  |
| <i>Wallemia sebi</i>                    | 486  | 2.E-136 |
| <i>Wilcoxina mikolae</i>                | 420  | 2.E-116 |
| <i>Wilcoxina mikolae</i>                | 356  | 2.E-97  |
| <i>Wilcoxina mikolae</i>                | 475  | 4.E-133 |
| <i>Wilcoxina mikolae</i>                | 470  | 1.E-131 |
| <i>Wojnowicia</i> sp NW 2013            | 331  | 8.E-90  |
| <i>Xanthoria parietina</i>              | 172  | 5.E-42  |
| <i>Xenobotrytis acaducospora</i>        | 250  | 2.E-65  |
| <i>Xenochalara juniperi</i>             | 324  | 6.E-88  |
| <i>Xenochalara juniperi</i>             | 437  | 1.E-121 |
| <i>Xenochalara juniperi</i>             | 379  | 2.E-104 |
| <i>Xenopolyscytalum pinea</i>           | 374  | 1.E-102 |
| <i>Xenopolyscytalum pinea</i>           | 370  | 1.E-101 |
| <i>Xenopolyscytalum pinea</i>           | 416  | 2.E-115 |
| <i>Xylaria globosa</i>                  | 97.1 | 3.E-19  |
| <i>Xylaria intracolorata</i>            | 313  | 2.E-84  |
| <i>Xylodon sambuci</i>                  | 381  | 7.E-105 |
| <i>Zeloasperisporium hyphopodioides</i> | 213  | 2.E-54  |
| <i>Zopfiella tabulata</i>               | 171  | 2.E-41  |
| <i>Zychaea mexicana</i>                 | 61.8 | 1.E-08  |

---
