# Supplementary material for: Comparison and Validation of Some ITS Primer Pairs Useful for Fungal Metabarcoding Studies
Source: PubMed Central journal article supplement (PMC4059633; doi:10.1371/journal.pone.0097629), 2014-06-16
Supplement: pone.0097629.s006.pdf [file pone.0097629.s006.pdf]

## Supporting Information Table S4

Taxonomic composition of fungal species (n = 15) used in the current study to assess PCR bias at the phylum level

| Genus/species                       | Strain        | Family             | Order             | Phylum        |
|-------------------------------------|---------------|--------------------|-------------------|---------------|
| <i>Cladosporium cladosporioides</i> | MUCL 53652    | Cladosporiaceae    | Capnodiales       | Ascomycota    |
| <i>Cryptosporiopsis radicicola</i>  | MUCL 53485    | Dermateaceae       | Helotiales        | Ascomycota    |
| <i>Monilinia laxa</i>               | MUCL 30841    | Sclerotiniaceae    | Helotiales        | Ascomycota    |
| <i>Arthroderma otae</i>             | MUCL 39756    | Arthrodermataceae  | Onygenales        | Ascomycota    |
| <i>Galactomyces geotrichum</i>      | MUCL 52377    | Dipodascaceae      | Saccharomycetales | Ascomycota    |
| <i>Lentinula edodes</i>             | MUCL 44827    | Omphalotaceae      | Agaricales        | Basidiomycota |
| <i>Agrocybe praecox</i>             | MUCL 46727    | Strophariaceae     | Agaricales        | Basidiomycota |
| <i>Coniophora marmorata</i>         | MUCL 39471    | Coniophoraceae     | Boletales         | Basidiomycota |
| <i>Suillus luteus</i>               | UH-Slu-Lm8-n1 | Suillaceae         | Boletales         | Basidiomycota |
| <i>Antrodia vaillantii</i>          | MUCL 54533    | Fomitopsidaceae    | Polyporales       | Basidiomycota |
| <i>Rhizophagus clareus</i>          | MUCL 46238    | Glomeraceae        | Glomerales        | Glomeromycota |
| <i>Rhizophagus</i> sp.              | MUCL 41833    | Glomeraceae        | Glomerales        | Glomeromycota |
| <i>Mortierella verticillata</i>     | MUCL 9658     | Mortierellaceae    | Mortierellales    | Zygomycota    |
| <i>Absidia corymbifera</i>          | MUCL 38907    | Cunninghamellaceae | Mucorales         | Zygomycota    |
| <i>Mucor hiemalis</i>               | MUCL 15439    | Mucoraceae         | Mucorales         | Zygomycota    |
