# Supplementary material for: Comparison and Validation of Some ITS Primer Pairs Useful for Fungal Metabarcoding Studies
Source: PubMed Central journal article supplement (PMC4059633; doi:10.1371/journal.pone.0097629), 2014-06-16
Supplement: pone.0097629.s007.pdf [file pone.0097629.s007.pdf]

## Supporting Information Table S5

PCR efficiencies calculated with qPCR of all species and primer pair combinations used to assess phylum-level PCR bias in the current study

| Genus/species                       | Strain        | PCR efficiency (%) |           |             |
|-------------------------------------|---------------|--------------------|-----------|-------------|
|                                     |               | ITS1F/ITS2         | ITS3/ITS4 | ITS86F/ITS4 |
| <i>Cladosporium cladosporioides</i> | MUCL 53652    | 55                 | 85        | 92          |
| <i>Cryptosporiopsis radicicola</i>  | MUCL 53485    | 58                 | 56        | 131         |
| <i>Monilinia laxa</i>               | MUCL 30841    | 74                 | 72        | 78          |
| <i>Arthroderma otae</i>             | MUCL 39756    | 36                 | 80        | 91          |
| <i>Galactomyces geotrichum</i>      | MUCL 52377    | 106                | 87        | 39          |
| <i>Lentinula edodes</i>             | MUCL 44827    | 70                 | 39        | 77          |
| <i>Agrocybe praecox</i>             | MUCL 46727    | 73                 | 98        | 112         |
| <i>Coniophora marmorata</i>         | MUCL 39471    | 73                 | 64        | 69          |
| <i>Suillus luteus</i>               | UH-Slu-Lm8-n1 | 85                 | 88        | 94          |
| <i>Antrodia vaillantii</i>          | MUCL 54533    | 51                 | 88        | 101         |
| <i>Rhizophagus clareus</i>          | MUCL 46238    | 117                | 126       | 85          |
| <i>Rhizophagus</i> sp.              | MUCL 41833    | 116                | 82        | 74          |
| <i>Mortierella verticillata</i>     | MUCL 9658     | 106                | 74        | 86          |
| <i>Absidia corymbifera</i>          | MUCL 38907    | 60                 | 74        | 65          |
| <i>Mucor hiemalis</i>               | MUCL 15439    | 88                 | 98        | 93          |
| Average                             |               | 78                 | 81        | 86          |
| Standard error                      |               | 6                  | 5         | 5           |
