# Supplementary material for: Comparison and Validation of Some ITS Primer Pairs Useful for Fungal Metabarcoding Studies
Source: PubMed Central journal article supplement (PMC4059633; doi:10.1371/journal.pone.0097629), 2014-06-16
Supplement: pone.0097629.s008.pdf [file pone.0097629.s008.pdf]

## Supporting Information Table S6

PrimerProspector [34] results for all primers investigated in this study and investigated by Ihrmark et al. [35] and Toju et al. [36]

| Primer binding site and orientation | Primer name | Primer sequence (5' - 3') | 3' mismatch (%) | Average Primer Prospector Score | Standard Error on Score | Reference |
|-------------------------------------|-------------|---------------------------|-----------------|---------------------------------|-------------------------|-----------|
| 5.8S<br>(forward)                   | ITS86F      | GTGAATCATCGAATCTTTGAA     | 3               | 0.00                            | 0.00                    | [27]      |
|                                     | ITS3        | GCATCGATGAAGAACGCAGC      | 4               | 0.58                            | 0.03                    | [18]      |
|                                     | gITS9       | GAACGCAGCRAAIIGYGA        | 4               | 0.41                            | 0.02                    | [35]      |
|                                     | fITS7       | GTGARTCATCGAATCTTTG       | 4               | 0.49                            | 0.02                    | [35]      |
|                                     | gITS7       | GTGARTCATCGARTCTTTG       | 4               | 0.49                            | 0.02                    | [35]      |
|                                     | ITS3_KYO1   | AHCGATGAAGAACRYAG         | 5               | 0.42                            | 0.02                    | [36]      |
|                                     | ITS3_KYO2   | GATGAAGAACGYAGYRAA        | 2               | 0.40                            | 0.02                    | [36]      |
|                                     | 58A1F       | GCATCGATGAAGAACGC         | 5               | 0.51                            | 0.02                    | [37]      |
|                                     | 58A2F       | ATCGATGAAGAACGCAG         | 6               | 0.52                            | 0.02                    | [37]      |
| 5.8S<br>(reverse)                   | ITS2        | GCTGCGTTCTTCATCGATGC      | 9               | 0.70                            | 0.03                    | [18]      |
|                                     | ITS10mun    | GCTGCGTTCTTCATCGAT        | 3               | 0.48                            | 0.02                    | [38]      |
|                                     | ITS2_KYO1   | CTRYGTTCTTCATCGDT         | 2               | 0.37                            | 0.02                    | [36]      |
|                                     | ITS2_KYO2   | TTYRCTRRCGTTCTTCATC       | 5               | 0.49                            | 0.02                    | [36]      |
|                                     | 58A2R       | CTGCGTTCTTCATCGAT         | 3               | 0.47                            | 0.02                    | [37]      |

| Primer binding site and orientation | Primer name             | Primer sequence (5' - 3') | 3' mismatch (%) | Average Primer Prospector Score | Standard Error on Score | Reference |
|-------------------------------------|-------------------------|---------------------------|-----------------|---------------------------------|-------------------------|-----------|
| 28S<br>(reverse)                    | ITS4B                   | CAGGAGACTTGTACACGGTCCAG   | 41              | 5.75                            | 0.03                    | [19]      |
|                                     | ITS4_KYO1               | TCCTCCGCTTWTGWTWTGC       | 23              | 3.71                            | 0.04                    | [36]      |
|                                     | ITS4_KYO2               | RBTTTCTTTTCCTCCGCT        | 44              | 4.39                            | 0.03                    | [36]      |
|                                     | ITS4_KYO3               | CTBTTVCCCKCTTCACTCG       | 42              | 3.47                            | 0.04                    | [36]      |
|                                     | ITS4                    | TCCTCCGCTTATTGATATGC      | 16              | 3.96                            | 0.04                    | [18]      |
|                                     | ITS8mun                 | CTTCACTCGCCGTTACTA        | 61              | 4.07                            | 0.03                    | [38]      |
|                                     | NL6Amun                 | CAAGTGCTTCCCTTTCAACA      | 10              | 3.49                            | 0.03                    | [38]      |
|                                     | NL6Bmun                 | CAAGCGTTTCCCTTTCAACA      | 9               | 3.32                            | 0.03                    | [38]      |
|                                     | NLB3                    | GGATTCTCACCTCTATGA        | 13              | 3.04                            | 0.03                    | [37]      |
|                                     | NLB4                    | GGATTCTCACCTCTATGAC       | 53              | 4.17                            | 0.04                    | [37]      |
| NLC2                                | GAGCTGCATTCCCAAACAACCTC | 25                        | 3.90            | 0.04                            | [37]                    |           |

| Primer binding site and orientation | Primer name | Primer sequence (5' - 3') | 3' mismatch (%) | Average Primer Prospector Score | Standard Error on Score | Reference |
|-------------------------------------|-------------|---------------------------|-----------------|---------------------------------|-------------------------|-----------|
| 18S<br>(forward)                    | ITS1        | TCCGTAGGTGAACCTGCGG       | 12              | 2.29                            | 0.04                    | [18]      |
|                                     | ITS1F       | CTTGGTCATTTAGAGGAAGTAA    | 44              | 4.55                            | 0.05                    | [19]      |
|                                     | ITS1F_KYO1  | CTHGGTCATTTAGAGGAASTAA    | 36              | 4.11                            | 0.05                    | [36]      |
|                                     | ITS1F_KYO2  | TAGAGGAAGTAAAAGTCGTAA     | 15              | 3.43                            | 0.04                    | [36]      |
|                                     | ITS5        | GGAAGTAAAAGTCGTAAACAAGG   | 8               | 2.96                            | 0.04                    | [18]      |
|                                     | ITS9mun     | TGTACACACCGCCCGTCG        | 27              | 3.34                            | 0.04                    | [38]      |
|                                     | NSI1        | GATTGAATGGCTTAGTGAGG      | 36              | 4.11                            | 0.04                    | [37]      |
|                                     | NSA3        | AAACTCTGTCGTGCTGGGGATA    | 40              | 4.66                            | 0.04                    | [37]      |
